# Supplementary material for: Landscape of germline BRCA1/BRCA2 variants in breast and ovarian cancer in Peru
Source: Front Oncol. 2023 Aug 17;13:1227864. doi: 10.3389/fonc.2023.1227864 (PMC10470619; doi:10.3389/fonc.2023.1227864)
Supplement: Supplementary file 1 [file Table_1.xlsx]

## Sheet: Sheet1
	TABLA S1: Description of variants of uncertain significance in BRCA1/BRCA2 in our patients.
	Gene	HGVSc Nomenclature	HGVSp Nomenclature	Effect	Exon	Frequency % (n)	Tumor type		Mutation type	Reference	PolyPhen-2 Score
											HumDiv	HumVar
	BRCA1
	(n=9)	3481G>A	Glu1161Lys	E1161K	10	1.11% (1)	OC		missense	ACMG/ClinVar	0.947	0.78
		3676T>G	Phe1226Val	F1226V	10	1.11% (1)	OC		missense	ACMG	0.483	0.084
		3839C>G	Ser1280Cys	S1280C	10	1.11% (1)	OC		missense	ACMG	0.03	0.011
		4057G>A	Glu1353Lys	E1353K	10	1.11% (1)	OC		missense	ACMG/ClinVar	0.799	0.214
		4118A>G	Glu1373Gly	E1373G	11	1.11% (1)	OC		missense	ACMG	0.255	0.071
		4679G>T	Gly1560Val	G1560V	15	1.11% (1)	OC		missense	ACMG/ClinVar	0.146	0.038
		93C>G*	Ile31Met	I31M	3	2.22% (2)	OC (1), TNBC (1)		missense	ACMG/ClinVar	0.994	0.916
		287A>G*	Asp96Gly	D96G	5	1.11% (1)	OC		missense	ACMG/ClinVar	0.979	0.549
	BRCA2 (n=29)
		5465A>T	Asn1822Ile	N1822I	11	13.79% (4)	OC (1), TNBC (2), BC (HER2- RH+( 1))		missense	ACMG/ClinVar	0.988	0.758
		3101T>C	Ile1034Thr	I1034T	11	10.34% (3)	OC		missense	ACMG/ClinVar	1.000	0.999
		437T>C	Leu146Pro	L146P	5	6.89% (2)	OC (1), TNBC (1)		missense	ACMG/ClinVar	0.266	0.077
		3685G>A	Val1229Ile	V1229I	11	6.89% (2)	OC		missense	ACMG/ClinVar	0.079	0.068
		1874T>C	Phe625Ser	F625S	10	3.45% (1)	OC		missense	ACMG/ClinVar	0.982	0.785
		2924T>G	Ile975Ser	I975S	11	3.45% (1)	OC		missense	ACMG/ClinVar	0.005	0.004
		5396C>T	Ala1799Val	A1799V	11	3.45% (1)	TNBC (1)		missense	ACMG/ClinVar	0.005	0.002
		5674G>A	Gly1892Ser	G1892S	11	3.45% (1)	OC		missense	ACMG/ClinVar	0.01	0.005
		6692C>G	Ala2231Gly	A2231G	11	3.45% (1)	OC		missense	ACMG	1.000	0.965
		7976+5G>T				3.45% (1)	OC		splicing variant	ACMG/ClinVar
		8018A>G	Lys2673Arg	K2673R	18	3.45% (1)	BC (HER2- RH+)		missense	ACMG/ClinVar	0.856	0.544
		8468A>G	Gln2823Arg	Q2823R	19	3.45% (1)	OC		missense	ACMG/ClinVar	0.999	0.992
		8590_8592delGCC	Ala2864del	A2864del	20	3.45% (1)	OC		inframe deletion	ACMG/ClinVar
		9185A>G	Asp3062Gly	D3062G	24	3.45% (1)	OC		missense	ACMG	0.994	0.868
		9141G>T	Gln3047His	Q3047H	24	3.45% (1)	TNBC (1)		missense	ACMG/ClinVar	0.023	0.011
		2274T>G*	Ser758Arg	S758R	11	3.45% (1)	OC		missense	ACMG/ClinVar	0.002	0.003
		3509C>T*	Ala1170Val	A1170V	11	3.45% (1)	OC		missense	ACMG/ClinVar	0.011	0.003
		7617+6T>C*				3.45% (1)	BC (HER2- RH+)		splicing variant	ACMG/ClinVar
		7759C>T*	Leu2587Phe	L2587F	16	3.45% (1)	OC		missense	ACMG/ClinVar	1.000	1.000
		8462T>C**	Ile2821Thr	I2821T	19	3.45% (1)	TNBC (1)		missense	ACMG/ClinVar	0.981	0.921
	*	ACMG classification: VUS; ClinVar classification: Conflicting Interpretations of Pathogenicity (April-May 2021)
	**	ACMG classification: VUS; ClinVar classification: Likely Benign (April 2021)
