# Supplementary material for: Landscape of germline BRCA1/BRCA2 variants in breast and ovarian cancer in Peru
Source: Front Oncol. 2023 Aug 17;13:1227864. doi: 10.3389/fonc.2023.1227864 (PMC10470619; doi:10.3389/fonc.2023.1227864)
Supplement: Supplementary file 2 [file Table_2.xlsx]

## Sheet: Table S2
Table S2.- Clinicopathological and Molecular status of patients included in the study
ID patient	Gender	Clinical stage	Birth place (by deparments)	Birth place (by regions)	Birth date (dd/mm/yyyy)	Registration date (dd/mm/yyyy)	Cancer type	DX subtype	Hugo Symbol	Sample ID	Protein Change	Exon	HSGVc	HSGVp	Variant type	Germline variant classification
1	F	III	PIURA	COAST	1955-11-30	2018-04-26	ovarian	High-Grade Serous Carcinoma	BRCA2	TMR15-0397	A1170V	11	3509C>T	Ala1170Val	missense variant	VUS
2	F	III	ANCASH	COAST	1968-04-04	2018-04-26	ovarian	High-Grade Serous Carcinoma	BRCA1	TMR15-0398	T276Afs*14	10	815_824dupAGCCATGTGG	Thr276Alafs*14	inframe insertion	pathogenic
3	F	III	APURIMAC	HIGHLANDS	1956-12-22	2018-05-02	ovarian	High-Grade Serous Carcinoma	Not variant found	TMR15-0404					Not variant found	Not variant found
4	F	III	LIMA	LIMA/CALLAO	1971-04-08	2018-05-02	ovarian	High-Grade Serous Carcinoma	BRCA1	TMR15-0405	E23Vfs*17	2	68_69delAG	Glu23Valfs*17	inframe deletion	pathogenic
5	F	III	LIMA	LIMA/CALLAO	1950-11-20	2018-05-21	ovarian	High-Grade Serous Carcinoma	Not variant found	TMR15-0425					Not variant found	Not variant found
6	F	III	LIMA	LIMA/CALLAO	1973-06-12	2018-05-22	breast	HER2- RH-	BRCA1	TMR15-0430	L702Ffs*10	10	2105dupT	Leu702Phefs*10	inframe insertion	pathogenic
7	F	IV	LIMA	LIMA/CALLAO	1988-03-24	2018-05-28	ovarian	High-Grade Serous Carcinoma	Not variant found	TMR15-0437					Not variant found	Not variant found
8	F	IV	LIMA	LIMA/CALLAO	1944-09-14	2018-05-28	ovarian	High-Grade Serous Carcinoma	Not variant found	TMR15-0438					Not variant found	Not variant found
9	F	III	LIMA	LIMA/CALLAO	1971-09-30	2018-05-29	ovarian	High-Grade Serous Carcinoma	Not variant found	TMR15-0439					Not variant found	Not variant found
10	F	IV	LIMA	LIMA/CALLAO	1979-06-12	2018-06-05	breast	HER2- RH-	Not variant found	TMR15-0446					Not variant found	Not variant found
11	F	III	LIMA	LIMA/CALLAO	1966-07-15	2018-06-06	ovarian	High-Grade Serous Carcinoma	BRCA1	TMR15-0448	L702Ffs*10	10	2105dupT	Leu702Phefs*10	inframe insertion	pathogenic
12	F	III	CALLAO	LIMA/CALLAO	1961-07-07	2018-06-07	ovarian	Clear Cell Carcinoma	Not variant found	TMR15-0449					Not variant found	Not variant found
13	F	IV	LIMA	LIMA/CALLAO	1948-09-05	2018-06-08	ovarian	High-Grade Serous Carcinoma	Not variant found	TMR15-0451					Not variant found	Not variant found
14	F	III	JUNIN	HIGHLANDS	1958-03-24	2018-06-11	ovarian	High-Grade Serous Carcinoma	Not variant found	TMR15-0454					Not variant found	Not variant found
15	F	III	APURIMAC	HIGHLANDS	1953-06-22	2018-06-12	ovarian	High-Grade Serous Carcinoma	Not variant found	TMR15-0455					Not variant found	Not variant found
16	F	III	AREQUIPA	COAST	1958-11-09	2018-06-12	ovarian	High-Grade Serous Carcinoma	Not variant found	TMR15-0456					Not variant found	Not variant found
17	F	III	LIMA	LIMA/CALLAO	1964-05-29	2018-06-12	ovarian	High-Grade Serous Carcinoma	BRCA1	TMR15-0457	A1708E	17	5123C>A	Ala1708Glu	missense variant	pathogenic
18	F	IV	CALLAO	LIMA/CALLAO	1968-12-08	2018-06-12	breast	HER2- RH-	BRCA2	TMR15-0458	L146P	5	437T>C	Leu146Pro	missense variant	VUS
19	F	III	PIURA	COAST	1955-04-21	2018-06-13	ovarian	High-Grade Serous Carcinoma	Not variant found	TMR15-0461					Not variant found	Not variant found
20	F	III	CAJAMARCA	HIGHLANDS	1958-02-04	2018-06-13	ovarian	High-Grade Serous Carcinoma	BRCA2	TMR15-0462	Q2009Afs*9	11	6024dupG	Gln2009Alafs*9	inframe insertion	pathogenic
21	F	III	LIMA	LIMA/CALLAO	1956-05-26	2018-06-18	ovarian	High-Grade Serous Carcinoma	Not variant found	TMR15-0464					Not variant found	Not variant found
22	F	IV	ANCASH	COAST	1951-03-28	2018-06-22	ovarian	High-Grade Serous Carcinoma	BRCA2	TMR15-0469	V220Ifs*4	8	658_659delGT	Val220Ilefs*4	inframe deletion	pathogenic
23	F	III	HUANCAVELICA	HIGHLANDS	1952-12-19	2018-06-25	ovarian	High-Grade Serous Carcinoma	Not variant found	TMR15-0471					Not variant found	Not variant found
24	F	III	LIMA	LIMA/CALLAO	1953-11-15	2018-06-26	ovarian	High-Grade Serous Carcinoma	Not variant found	TMR15-0472					Not variant found	Not variant found
25	F	IV	LIMA	LIMA/CALLAO	1965-01-12	2018-06-27	ovarian	High-Grade Serous Carcinoma	BRCA1	TMR15-0477	L702Ffs*10	10	2105dupT	Leu702Phefs*10	inframe insertion	pathogenic
26	F	III	JUNIN	HIGHLANDS	1949-03-02	2018-07-02	ovarian	High-Grade Serous Carcinoma	Not variant found	TMR15-0478					Not variant found	Not variant found
27	F	III	ICA	COAST	1950-12-05	2018-07-04	ovarian	High-Grade Serous Carcinoma	Not variant found	TMR15-0488					Not variant found	Not variant found
28	F	III	LIMA	LIMA/CALLAO	1950-11-15	2018-07-06	ovarian	High-Grade Serous Carcinoma	Not variant found	TMR15-0491					Not variant found	Not variant found
29	F	IV	JUNIN	HIGHLANDS	1938-09-08	2018-07-10	ovarian	High-Grade Serous Carcinoma	Not variant found	TMR15-0496					Not variant found	Not variant found
30	F	IV	LIMA	LIMA/CALLAO	1975-10-14	2018-07-17	ovarian	High-Grade Serous Carcinoma	Not variant found	TMR15-0502					Not variant found	Not variant found
31	F	III	LIMA	LIMA/CALLAO	1940-05-25	2018-07-17	ovarian	High-Grade Serous Carcinoma	Not variant found	TMR15-0503					Not variant found	Not variant found
32	F	III	ICA	COAST	1944-07-02	2018-07-23	ovarian	High-Grade Serous Carcinoma	Not variant found	TMR15-0506					Not variant found	Not variant found
34	F	IV	ANCASH	COAST	1978-08-22	2018-08-08	ovarian	High-Grade Serous Carcinoma	Not variant found	TMR15-0521					Not variant found	Not variant found
35	F	III	AYACUCHO	HIGHLANDS	1959-10-20	2018-08-09	ovarian	High-Grade Serous Carcinoma	Not variant found	TMR15-0522					Not variant found	Not variant found
36	F	III	LIMA	LIMA/CALLAO	1957-03-11	2018-08-09	ovarian	High-Grade Serous Carcinoma	Not variant found	TMR15-0524					Not variant found	Not variant found
37	F	IV	HUANCAVELICA	HIGHLANDS	1973-04-25	2018-08-20	ovarian	High-Grade Serous Carcinoma	Not variant found	TMR15-0527					Not variant found	Not variant found
38	F	IV	LIMA	LIMA/CALLAO	1967-02-12	2018-08-21	ovarian	Clear Cell Carcinoma	Not variant found	TMR15-0531					Not variant found	Not variant found
39	F	III	LIMA	LIMA/CALLAO	1936-04-18	2018-08-21	ovarian	High-Grade Serous Carcinoma	Not variant found	TMR15-0532					Not variant found	Not variant found
40	F	IV	LIMA	LIMA/CALLAO	1929-08-06	2018-08-21	ovarian	High-Grade Serous Carcinoma	Not variant found	TMR15-0533					Not variant found	Not variant found
41	F	IV	LAMBAYEQUE	COAST	1967-05-09	2018-08-22	ovarian	High-Grade Serous Carcinoma	Not variant found	TMR15-0534					Not variant found	Not variant found
42	F	III	LIMA	LIMA/CALLAO	1963-02-02	2018-08-23	ovarian	High-Grade Serous Carcinoma	Not variant found	TMR15-0541					Not variant found	Not variant found
44	F	III	LIMA	LIMA/CALLAO	1942-06-06	2018-09-13	ovarian	High-Grade Serous Carcinoma	Not variant found	TMR15-0567					Not variant found	Not variant found
45	F	IV	LIMA	LIMA/CALLAO	1950-02-06	2018-09-14	ovarian	High-Grade Serous Carcinoma	BRCA2	TMR15-0568	S758R	11	2274T>G	Ser758Arg	missense variant	VUS
46	F	III	LIMA	LIMA/CALLAO	1946-04-20	2018-09-18	ovarian	High-Grade Serous Carcinoma	BRCA1	TMR15-0574	L702Ffs*10	10	2105dupT	Leu702Phefs*10	inframe insertion	pathogenic
47	F	IV	LIMA	LIMA/CALLAO	1979-03-30	2018-09-18	ovarian	High-Grade Serous Carcinoma	Not variant found	TMR15-0575					Not variant found	Not variant found
48	F	IV	ANCASH	COAST	1962-08-23	2018-09-19	ovarian	High-Grade Serous Carcinoma	Not variant found	TMR15-0576					Not variant found	Not variant found
49	F	IV	AYACUCHO	HIGHLANDS	1978-10-18	2018-09-19	ovarian	High-Grade Serous Carcinoma	Not variant found	TMR15-0580					Not variant found	Not variant found
50	F	IV	HUANUCO	HIGHLANDS	1949-01-28	2018-09-24	ovarian	High-Grade Serous Carcinoma	Not variant found	TMR15-0583					Not variant found	Not variant found
51	F	III	HUANUCO	HIGHLANDS	1985-12-08	2018-09-25	ovarian	Clear Cell Carcinoma	Not variant found	TMR15-0588					Not variant found	Not variant found
52	F	III	ICA	COAST	1960-11-09	2018-09-26	ovarian	High-Grade Serous Carcinoma	Not variant found	TMR15-0591					Not variant found	Not variant found
53	F	IV	LIMA	LIMA/CALLAO	1966-12-10	2018-09-27	ovarian	High-Grade Serous Carcinoma	Not variant found	TMR15-0592					Not variant found	Not variant found
55	F	III	LIMA	LIMA/CALLAO	1947-03-29	2018-10-01	ovarian	High-Grade Serous Carcinoma	Not variant found	TMR15-0596					Not variant found	Not variant found
56	F	III	ICA	COAST	1961-10-21	2018-10-10	ovarian	High-Grade Serous Carcinoma	Not variant found	TMR15-0608					Not variant found	Not variant found
57	F	III	LIMA	LIMA/CALLAO	1975-06-12	2018-10-11	ovarian	High-Grade Serous Carcinoma	BRCA1	TMR15-0612	S782Kfs*8	10	2344dupA	Ser782Lysfs*8	inframe insertion	pathogenic
58	F	III	LIMA	LIMA/CALLAO	1963-02-10	2018-10-22	ovarian	High-Grade Serous Carcinoma	Not variant found	TMR15-0615					Not variant found	Not variant found
59	F	IV	PIURA	COAST	1960-01-25	2018-10-23	breast	HER2- RH-	Not variant found	TMR15-0620					Not variant found	Not variant found
60	F	III	LIMA	LIMA/CALLAO	1958-06-11	2018-10-24	breast	HER2- RH+	Not variant found	TMR15-0621					Not variant found	Not variant found
61	F	III	LIMA	LIMA/CALLAO	1969-04-24	2018-10-29	ovarian	High-Grade Serous Carcinoma	BRCA2	TMR15-0625	I1034T	11	3101T>C	Ile1034Thr	missense variant	VUS
62	F	III	PIURA	COAST	1959-01-10	2018-10-29	ovarian	High-Grade Serous Carcinoma	Not variant found	TMR15-0626					Not variant found	Not variant found
63	F	IV	ICA	COAST	1974-05-27	2018-10-29	breast	HER2- RH-	Not variant found	TMR15-0627					Not variant found	Not variant found
64	F	III	LIMA	LIMA/CALLAO	1962-04-27	2018-10-29	breast	HER2- RH-	Not variant found	TMR15-0628					Not variant found	Not variant found
65	F	IV	PIURA	COAST	1960-09-17	2018-10-30	ovarian	High-Grade Serous Carcinoma	Not variant found	TMR15-0632					Not variant found	Not variant found
66	F	III	HUANCAVELICA	HIGHLANDS	1955-11-09	2018-10-30	ovarian	High-Grade Serous Carcinoma	Not variant found	TMR15-0633					Not variant found	Not variant found
67	F	III	LORETO	JUNGLE	1953-07-10	2018-10-30	ovarian	High-Grade Serous Carcinoma	Not variant found	TMR15-0634					Not variant found	Not variant found
68	F	III	LIMA	LIMA/CALLAO	1944-05-09	2018-10-30	breast	HER2- RH+	Not variant found	TMR15-0635					Not variant found	Not variant found
69	F	IV	LAMBAYEQUE	COAST	1953-04-23	2018-11-05	ovarian	High-Grade Serous Carcinoma	BRCA2	TMR15-0641	E1734Gfs*9	11	5200dupG	Glu1734Glyfs*9	inframe insertion	pathogenic
70	F	IV	LIMA	LIMA/CALLAO	1954-01-30	2018-11-05	ovarian	High-Grade Serous Carcinoma	BRCA1	TMR15-0642	P346S		1036C>T	Pro346Ser	missense variant	benign
71	F	IV	HUANUCO	HIGHLANDS	1979-12-29	2018-11-05	breast	HER2- RH+	BRCA1	TMR15-0643	K654Sfs*47	10	1961delA	Lys654Serfs*47	inframe deletion	pathogenic
72	F	IV	LIMA	LIMA/CALLAO	1962-02-13	2018-11-02	breast	HER2- RH-	BRCA2	TMR15-0644	N1822I	11	5465A>T	Asn1822Ile	missense variant	VUS
73	F	III	LIMA	LIMA/CALLAO	1992-03-26	2018-11-07	breast	HER2- RH-	Not variant found	TMR15-0646					Not variant found	Not variant found
74	F	III	LIMA	LIMA/CALLAO	1953-06-17	2018-11-07	ovarian	High-Grade Serous Carcinoma	Not variant found	TMR15-0647					Not variant found	Not variant found
75	F	IV	JUNIN	HIGHLANDS	1969-06-02	2018-11-08	breast	HER2- RH+	Not variant found	TMR15-0648					Not variant found	Not variant found
76	F	III	PIURA	COAST	1961-02-20	2018-11-12	ovarian	High-Grade Serous Carcinoma	Not variant found	TMR15-0651					Not variant found	Not variant found
77	F	III	LIMA	LIMA/CALLAO	1958-01-24	2018-11-12	ovarian	High-Grade Serous Carcinoma	Not variant found	TMR15-0654					Not variant found	Not variant found
78	F	III	LIMA	LIMA/CALLAO	1979-12-20	2018-11-13	ovarian	Clear Cell Carcinoma	Not variant found	TMR15-0655					Not variant found	Not variant found
79	F	IV	LORETO	JUNGLE	1967-08-02	2018-11-19	ovarian	High-Grade Serous Carcinoma	Not variant found	TMR15-0656					Not variant found	Not variant found
80	F	IV	LA LIBERTAD	COAST	1985-02-24	2018-11-19	ovarian	High-Grade Serous Carcinoma	BRCA1	TMR15-0657	I31M	3	93C>G	Ile31Met	missense variant	VUS
81	F	IV	LA LIBERTAD	COAST	1985-02-24	2018-11-19	ovarian	High-Grade Serous Carcinoma	BRCA2	TMR15-0657	I1034T	11	3101T>C	Ile1034Thr	missense variant	VUS
82	F	IV	LIMA	LIMA/CALLAO	1982-12-27	2018-11-13	breast	HER2- RH+	Not variant found	TMR15-0658					Not variant found	Not variant found
83	F	IV	ICA	COAST	1943-03-03	2018-11-14	ovarian	High-Grade Serous Carcinoma	Not variant found	TMR15-0659					Not variant found	Not variant found
84	F	III	LAMBAYEQUE	COAST	1969-03-17	2018-11-15	breast	HER2- RH-	BRCA1	TMR15-0660	E23Vfs*17	2	68_69delAG	Glu23Valfs*17	inframe deletion	pathogenic
85	F	III	LAMBAYEQUE	COAST	1956-01-18	2018-11-20	ovarian	High-Grade Serous Carcinoma	Not variant found	TMR15-0669					Not variant found	Not variant found
87	F	IV	AYACUCHO	HIGHLANDS	1969-06-12	2018-11-20	ovarian	High-Grade Serous Carcinoma	BRCA1	TMR15-0673	Y831*	10	2493T>G	Tyr831*	stop gained	pathogenic
88	F	III	LIMA	LIMA/CALLAO	1949-10-12	2018-11-21	ovarian	High-Grade Serous Carcinoma	Not variant found	TMR15-0674					Not variant found	Not variant found
89	F	IV	LORETO	JUNGLE	1952-03-02	2018-11-22	breast	HER2- RH-	Not variant found	TMR15-0676					Not variant found	Not variant found
90	F	III	CAJAMARCA	HIGHLANDS	1956-05-28	2018-11-22	ovarian	High-Grade Serous Carcinoma	Not variant found	TMR15-0677					Not variant found	Not variant found
91	F	IV	LIMA	LIMA/CALLAO	1974-07-28	2018-11-22	ovarian	High-Grade Serous Carcinoma	Not variant found	TMR15-0678					Not variant found	Not variant found
92	F	III	ANCASH	COAST	1952-07-19	2018-11-29	ovarian	High-Grade Serous Carcinoma	Not variant found	TMR15-0683					Not variant found	Not variant found
93	F	III	CUSCO	HIGHLANDS	1989-07-17	2018-11-28	ovarian	High-Grade Serous Carcinoma	Not variant found	TMR15-0684					Not variant found	Not variant found
94	F	III	LIMA	LIMA/CALLAO	1956-11-14	2018-11-29	ovarian	High-Grade Serous Carcinoma	BRCA2	TMR15-0687	N1822I	11	5465A>T	Asn1822Ile	missense variant	VUS
96	F	IV	CAJAMARCA	HIGHLANDS	1961-10-22	2018-12-03	breast	HER2- RH-	Not variant found	TMR15-0693					Not variant found	Not variant found
97	F	III	ANCASH	COAST	1978-04-20	2018-12-03	ovarian	High-Grade Serous Carcinoma	Not variant found	TMR15-0694					Not variant found	Not variant found
99	F	IV	LIMA	LIMA/CALLAO	1961-07-21	2018-12-03	ovarian	High-Grade Serous Carcinoma	Not variant found	TMR15-0696					Not variant found	Not variant found
100	F	IV	LIMA	LIMA/CALLAO	1983-04-10	2018-12-10	ovarian	High-Grade Serous Carcinoma	Not variant found	TMR15-0700					Not variant found	Not variant found
101	F	IV	ANCASH	COAST	-	2018-12-10	ovarian	High-Grade Serous Carcinoma	BRCA2	TMR15-0701	F625S	10	1874T>C	Phe625Ser	missense variant	VUS
102	F	IV	LAMBAYEQUE	COAST	1943-01-28	2018-12-10	ovarian	High-Grade Serous Carcinoma	Not variant found	TMR15-0702					Not variant found	Not variant found
103	F	IV	LIMA	LIMA/CALLAO	1979-12-26	2018-12-10	ovarian	High-Grade Serous Carcinoma	BRCA2	TMR15-0703	P69T	3	205C>A	Pro69Thr	missense variant	VUS
104	F	IV	LIMA	LIMA/CALLAO	1954-09-21	2018-12-10	breast	HER2- RH-	Not variant found	TMR15-0706					Not variant found	Not variant found
107	F	III	AREQUIPA	COAST	1960-01-24	2018-12-11	ovarian	High-Grade Serous Carcinoma	Not variant found	TMR15-0709					Not variant found	Not variant found
108	F	III	LIMA	LIMA/CALLAO	1949-04-22	2018-12-11	breast	HER2- RH+	Not variant found	TMR15-0710					Not variant found	Not variant found
109	F	IV	CAJAMARCA	HIGHLANDS	1955-03-10	2018-12-11	ovarian	High-Grade Serous Carcinoma	Not variant found	TMR15-0711					Not variant found	Not variant found
110	F	IV	PUNO	HIGHLANDS	1942-11-06	2018-12-12	ovarian	High-Grade Serous Carcinoma	Not variant found	TMR15-0712					Not variant found	Not variant found
113	F	IV	ICA	COAST	1952-08-18	2018-12-18	ovarian	High-Grade Serous Carcinoma	Not variant found	TMR15-0721					Not variant found	Not variant found
114	F	IV	ANCASH	COAST	1939-04-05	2018-12-20	ovarian	High-Grade Serous Carcinoma	Not variant found	TMR15-0722					Not variant found	Not variant found
118	F	III	LA LIBERTAD	COAST	1980-01-05	2018-12-20	ovarian	Endometrioid Carcinoma	Not variant found	TMR15-0726					Not variant found	Not variant found
120	F	IV	LIMA	LIMA/CALLAO	1963-10-09	2018-12-21	ovarian	High-Grade Serous Carcinoma	BRCA1	TMR15-0729	N363Ifs*11	10	1088delA	Asn363Ilefs*11	inframe deletion	pathogenic
123	F	III	ICA	COAST	1973-12-17	2019-01-02	ovarian	High-Grade Serous Carcinoma	Not variant found	TMR15-0738					Not variant found	Not variant found
124	F	III	LORETO	JUNGLE	1960-07-13	2019-01-03	ovarian	High-Grade Serous Carcinoma	Not variant found	TMR15-0741					Not variant found	Not variant found
125	F	IV	LIMA	LIMA/CALLAO	1960-09-23	2019-01-07	ovarian	High-Grade Serous Carcinoma	Not variant found	TMR15-0742					Not variant found	Not variant found
126	F	IV	ICA	COAST	1964-09-05	2019-01-07	ovarian	High-Grade Serous Carcinoma	Not variant found	TMR15-0743					Not variant found	Not variant found
127	F	III	CALLAO	LIMA/CALLAO	1958-02-08	2019-01-07	ovarian	High-Grade Serous Carcinoma	Not variant found	TMR15-0748					Not variant found	Not variant found
128	F	IV	LIMA	LIMA/CALLAO	1971-03-20	2019-01-07	ovarian	High-Grade Serous Carcinoma	Not variant found	TMR15-0749					Not variant found	Not variant found
129	F	III	ICA	COAST	1948-06-11	2019-01-09	ovarian	High-Grade Serous Carcinoma	BRCA1	TMR15-0750	E1161K	10	3481G>A	Glu1161Lys	missense variant	VUS
130	F	III	ANCASH	COAST	1947-09-06	2019-01-10	ovarian	High-Grade Serous Carcinoma	Not variant found	TMR15-0757					Not variant found	Not variant found
131	F	III	CALLAO	LIMA/CALLAO	1959-02-10	2019-01-14	ovarian	Clear Cell Carcinoma	Not variant found	TMR15-0762					Not variant found	Not variant found
133	F	III	LIMA	LIMA/CALLAO	1970-08-17	2019-01-15	ovarian	High-Grade Serous Carcinoma	BRCA1	TMR15-0764	E23Vfs*17	2	68_69delAG	Glu23Valfs*17	inframe deletion	pathogenic
134	F	IV	JUNIN	HIGHLANDS	1969-11-21	2019-01-17	breast	HER2- RH-	Not variant found	TMR15-0768					Not variant found	Not variant found
135	F	IV	CAJAMARCA	HIGHLANDS	1960-11-07	2019-01-22	ovarian	High-Grade Serous Carcinoma	Not variant found	TMR15-0777					Not variant found	Not variant found
136	F	IV	HUANUCO	HIGHLANDS	1950-10-08	2019-01-23	ovarian	High-Grade Serous Carcinoma	Not variant found	TMR15-0778					Not variant found	Not variant found
137	F	IV	LIMA	LIMA/CALLAO	1973-12-22	2019-01-24	breast	HER2- RH+	Not variant found	TMR15-0779					Not variant found	Not variant found
138	F	III	LIMA	LIMA/CALLAO	1942-03-08	2019-01-24	ovarian	High-Grade Serous Carcinoma	Not variant found	TMR15-0780					Not variant found	Not variant found
139	F	IV	LIMA	LIMA/CALLAO	1942-03-08	2019-01-24	breast	HER2- RH-	Not variant found	TMR15-0780					Not variant found	Not variant found
140	F	III	JUNIN	HIGHLANDS	1930-04-02	2019-01-28	ovarian	High-Grade Serous Carcinoma	Not variant found	TMR15-0784					Not variant found	Not variant found
142	F	IV	LIMA	LIMA/CALLAO	1979-10-19	2019-01-30	breast	HER2- RH+	Not variant found	TMR15-0788					Not variant found	Not variant found
144	F	IV	TACNA	COAST	1954-03-19	2019-01-30	ovarian	High-Grade Serous Carcinoma	Not variant found	TMR15-0790					Not variant found	Not variant found
145	F	III	ANCASH	COAST	1973-03-23	2019-01-31	ovarian	High-Grade Serous Carcinoma	Not variant found	TMR15-0791					Not variant found	Not variant found
147	F	III	ICA	COAST	1964-09-16	2019-02-01	breast	HER2- RH-	BRCA2	TMR15-0795	A1799V	11	5396C>T	Ala1779Val	missense variant	VUS
148	F	III	PIURA	COAST	1975-09-08	2019-02-04	ovarian	High-Grade Serous Carcinoma	Not variant found	TMR15-0796					Not variant found	Not variant found
150	F	III	LIMA	LIMA/CALLAO	1958-02-15	2019-02-08	ovarian	Clear Cell Carcinoma	Not variant found	TMR15-0802					Not variant found	Not variant found
151	F	IV	ICA	COAST	1952-11-21	2019-02-08	ovarian	Clear Cell Carcinoma	Not variant found	TMR15-0803					Not variant found	Not variant found
152	F	III	LIMA	LIMA/CALLAO	1973-04-09	2019-02-11	ovarian	High-Grade Serous Carcinoma	Not variant found	TMR15-0806					Not variant found	Not variant found
153	F	IV	LIMA	LIMA/CALLAO	1954-02-21	2019-02-13	ovarian	High-Grade Serous Carcinoma	Not variant found	TMR15-0810					Not variant found	Not variant found
155	F	III	LAMBAYEQUE	COAST	1963-06-24	2019-02-14	ovarian	High-Grade Serous Carcinoma	BRCA1	TMR15-0812	T276Afs*14	10	815_824dupAGCCATGTGG	Thr276Alafs*14	inframe insertion	pathogenic
156	F	III	LAMBAYEQUE	COAST	1963-06-24	2019-02-14	ovarian	High-Grade Serous Carcinoma	BRCA2	TMR15-0812	I2675V	18	8023A>G	Ile2675Val	missense variant	pathogenic
157	F	III	AYACUCHO	HIGHLANDS	65 años	2019-02-15	ovarian	High-Grade Serous Carcinoma	Not variant found	TMR15-0814					Not variant found	Not variant found
159	F	IV	ICA	COAST	1970-12-06	2019-02-20	ovarian	High-Grade Serous Carcinoma	BRCA2	TMR15-0819	N1880K		5640T>G	Asn1880Lys	missense variant	benign
160	F	III	LIMA	LIMA/CALLAO	1975-10-25	2019-02-21	ovarian	High-Grade Serous Carcinoma	Not variant found	TMR15-0820					Not variant found	Not variant found
162	F	III	LIMA	LIMA/CALLAO	1978-02-18	2019-02-26	ovarian	High-Grade Serous Carcinoma	Not variant found	TMR15-0822					Not variant found	Not variant found
163	F	III	LIMA	LIMA/CALLAO	1966-07-02	2019-02-27	ovarian	High-Grade Serous Carcinoma	Not variant found	TMR15-0827					Not variant found	Not variant found
164	F	IV	ANCASH	COAST	1984-02-10	2019-02-28	ovarian	High-Grade Serous Carcinoma	Not variant found	TMR15-0828					Not variant found	Not variant found
165	F	III	ANCASH	COAST	1974-07-26	2019-02-28	ovarian	Endometrioid Carcinoma	Not variant found	TMR15-0832					Not variant found	Not variant found
166	F	III	LIMA	LIMA/CALLAO	1964-06-08	2019-03-01	ovarian	High-Grade Serous Carcinoma	Not variant found	TMR15-0833					Not variant found	Not variant found
167	F	III	LIMA	LIMA/CALLAO	1964-06-08	2019-03-01	ovarian	High-Grade Serous Carcinoma	BRCA2	TMR15-0833	S1001Ffs*8	11	3001dupT	Ser1001Phefs*8	inframe insertion	pathogenic
168	F	III	TUMBES	COAST	1973-11-30	2019-03-04	ovarian	Endometrioid Carcinoma	Not variant found	TMR15-0834					Not variant found	Not variant found
171	F	IV	LIMA	LIMA/CALLAO	1944-10-26	2019-03-06	breast	HER2- RH-	BRCA2	TMR15-0840	K1132Tfs*11	11	3395_3396delAA	Lys1132Arg	inframe deletion	pathogenic
172	F	IV	LIMA	LIMA/CALLAO	1953-03-02	2019-03-07	breast	HER2- RH-	Not variant found	TMR15-0842					Not variant found	Not variant found
173	F	IV	JUNIN	HIGHLANDS	1974-05-06	2019-03-07	ovarian	High-Grade Serous Carcinoma	BRCA2	TMR15-0843		10		del_exon_10	deletion variant	pathogenic
174	F	IV	LA LIBERTAD	COAST	1958-07-28	2019-03-08	ovarian	High-Grade Serous Carcinoma	Not variant found	TMR15-0844					Not variant found	Not variant found
177	F	III	ANCASH	COAST	1953-05-16	2019-03-11	ovarian	High-Grade Serous Carcinoma	Not variant found	TMR15-0848					Not variant found	Not variant found
178	F	IV	JUNIN	HIGHLANDS	1961-07-09	2019-03-11	ovarian	High-Grade Serous Carcinoma	Not variant found	TMR15-0849					Not variant found	Not variant found
179	F	IV	PIURA	COAST	1961-02-20	2019-03-12	ovarian	High-Grade Serous Carcinoma	Not variant found	TMR15-0850					Not variant found	Not variant found
180	F	III	ICA	COAST	1964-09-05	2019-03-12	ovarian	High-Grade Serous Carcinoma	Not variant found	TMR15-0851					Not variant found	Not variant found
181	F	III	AREQUIPA	COAST	1942-10-11	2019-03-12	ovarian	High-Grade Serous Carcinoma	Not variant found	TMR15-0852					Not variant found	Not variant found
182	F	III	LIMA	LIMA/CALLAO	1969-03-18	2019-03-14	ovarian	High-Grade Serous Carcinoma	Not variant found	TMR15-0854					Not variant found	Not variant found
183	F	IV	PIURA	COAST	1968-04-07	2019-03-15	ovarian	High-Grade Serous Carcinoma	BRCA1	TMR15-0855	T276Afs*14	10	815_824dupAGCCATGTGG	Thr276Alfs*14	inframe insertion	pathogenic
184	F	IV	LIMA	LIMA/CALLAO	1962-08-03	2019-03-18	ovarian	High-Grade Serous Carcinoma	Not variant found	TMR15-0856					Not variant found	Not variant found
187	F	III	LIMA	LIMA/CALLAO	1971-02-04	2019-03-20	ovarian	Endometrioid Carcinoma	Not variant found	TMR15-0860					Not variant found	Not variant found
188	F	IV	LAMBAYEQUE	COAST	1965-10-20	2019-03-21	breast	HER2- RH-	BRCA1	TMR15-0861	D1152Afs*3	10	3455delA	Asp1152Alafs*3	inframe deletion	pathogenic
189	F	III	CALLAO	LIMA/CALLAO	2019-03-21	2019-03-21	ovarian	High-Grade Serous Carcinoma	Not variant found	TMR15-0862					Not variant found	Not variant found
191	F	IV	LIMA	LIMA/CALLAO	1977-08-06	2019-03-25	breast	HER2- RH-	Not variant found	TMR15-0869					Not variant found	Not variant found
192	F	IV	LIMA	LIMA/CALLAO	1948-06-24	2019-03-25	breast	HER2- RH-	Not variant found	TMR15-0870					Not variant found	Not variant found
193	F	IV	LIMA	LIMA/CALLAO	1963-10-11	2019-03-25	ovarian	High-Grade Serous Carcinoma	Not variant found	TMR15-0871					Not variant found	Not variant found
194	F	III	LIMA	LIMA/CALLAO	1980-01-11	2019-03-25	breast	HER2- RH-	Not variant found	TMR15-0872					Not variant found	Not variant found
197	F	IV	LIMA	LIMA/CALLAO	1956-09-14	2019-03-26	ovarian	High-Grade Serous Carcinoma	Not variant found	TMR15-0876					Not variant found	Not variant found
198	F	IV	AREQUIPA	COAST	1936-08-31	2019-03-26	ovarian	High-Grade Serous Carcinoma	Not variant found	TMR15-0877					Not variant found	Not variant found
199	F	III	PUNO	HIGHLANDS	1984-02-02	2019-03-27	ovarian	High-Grade Serous Carcinoma	Not variant found	TMR15-0878					Not variant found	Not variant found
200	F	IV	LIMA	LIMA/CALLAO	1982-11-05	2019-03-28	ovarian	High-Grade Serous Carcinoma	Not variant found	TMR15-0879					Not variant found	Not variant found
201	F	III	ICA	COAST	-	2019-03-28	ovarian	High-Grade Serous Carcinoma	BRCA1	TMR15-0880	S267Kfs*19	10	798_799delTT	Ser267Lysfs*19	inframe deletion	pathogenic
203	F	IV	ICA	COAST	1961-08-11	2019-03-28	ovarian	High-Grade Serous Carcinoma	Not variant found	TMR15-0882					Not variant found	Not variant found
204	F	IV	LIMA	LIMA/CALLAO	1971-02-05	2019-03-28	breast	HER2- RH-	BRCA2	TMR15-0883	W993*	11	2979G>A	Trp993*	missense variant	pathogenic
205	F	III	LIMA	LIMA/CALLAO	1963-09-02	2019-03-29	ovarian	High-Grade Serous Carcinoma	BRCA2	TMR15-0889	V3079Ffs*4	24	9235delG	Val3079Phefs*4	inframe deletion	pathogenic
206	F	III	LIMA	LIMA/CALLAO	1969-12-10	2019-04-01	ovarian	Endometrioid Carcinoma	Not variant found	TMR15-0891					Not variant found	Not variant found
207	F	III	LIMA	LIMA/CALLAO	1973-04-03	2019-04-01	ovarian	High-Grade Serous Carcinoma	Not variant found	TMR15-0892					Not variant found	Not variant found
208	F	IV	LIMA	LIMA/CALLAO	1965-02-01	2019-04-02	ovarian	High-Grade Serous Carcinoma	Not variant found	TMR15-0893					Not variant found	Not variant found
209	F	III	LIMA	LIMA/CALLAO	1981-07-03	2019-04-02	breast	HER2- RH+	Not variant found	TMR15-0894					Not variant found	Not variant found
210	F	III	PIURA	COAST	2019-04-08	2019-04-08	ovarian	High-Grade Serous Carcinoma	Not variant found	TMR15-0899					Not variant found	Not variant found
211	F	IV	LIMA	LIMA/CALLAO	1955-10-30	2019-04-09	ovarian	High-Grade Serous Carcinoma	Not variant found	TMR15-0901					Not variant found	Not variant found
212	F	III	LA LIBERTAD	COAST	1977-12-03	2019-04-11	breast	HER2- RH+	Not variant found	TMR15-0903					Not variant found	Not variant found
213	F	IV	LAMBAYEQUE	COAST	1950-01-09	2019-04-11	ovarian	High-Grade Serous Carcinoma	Not variant found	TMR15-0904					Not variant found	Not variant found
214	F	IV	HUANUCO	HIGHLANDS	1946-01-01	2019-04-11	ovarian	High-Grade Serous Carcinoma	Not variant found	TMR15-0906					Not variant found	Not variant found
217	F	IV	LIMA	LIMA/CALLAO	1976-01-30	2019-04-15	ovarian	High-Grade Serous Carcinoma	Not variant found	TMR15-0909					Not variant found	Not variant found
218	F	IV	PUNO	HIGHLANDS	1984-05-02	2019-04-16	ovarian	High-Grade Serous Carcinoma	Not variant found	TMR15-0910					Not variant found	Not variant found
219	F	III	LIMA	LIMA/CALLAO	1900-02-09	2019-04-17	ovarian	High-Grade Serous Carcinoma	Not variant found	TMR15-0912					Not variant found	Not variant found
220	F	IV	LIMA	LIMA/CALLAO	1972-02-10	2019-04-22	breast	HER2- RH-	Not variant found	TMR15-0914					Not variant found	Not variant found
221	F	IV	LIMA	LIMA/CALLAO	1973-04-27	2019-04-24	breast	HER2- RH-	Not variant found	TMR15-0916					Not variant found	Not variant found
222	F	III	PIURA	COAST	1972-12-13	2019-04-24	ovarian	High-Grade Serous Carcinoma	Not variant found	TMR15-0918					Not variant found	Not variant found
223	F	IV	LIMA	LIMA/CALLAO	1992-02-16	2019-04-24	ovarian	Low-Grade Serous Carcinoma	Not variant found	TMR15-0919					Not variant found	Not variant found
224	F	IV	LIMA	LIMA/CALLAO	1951-05-29	2019-04-24	ovarian	High-Grade Serous Carcinoma	Not variant found	TMR15-0920					Not variant found	Not variant found
225	F	IV	LIMA	LIMA/CALLAO	1977-02-15	2019-04-24	breast	HER2- RH-	Not variant found	TMR15-0921					Not variant found	Not variant found
226	F	IV	LIMA	LIMA/CALLAO	1989-07-11	2019-04-24	breast	HER2- RH-	Not variant found	TMR15-0922					Not variant found	Not variant found
227	F	III	PIURA	COAST	1956-08-28	2019-05-02	breast	HER2- RH-	Not variant found	TMR15-0928					Not variant found	Not variant found
228	F	III	PIURA	COAST	1959-02-12	2019-05-02	ovarian	Low-Grade Serous Carcinoma	Not variant found	TMR15-0929					Not variant found	Not variant found
229	F	IV	LIMA	LIMA/CALLAO	1965-07-11	2019-04-29	ovarian	High-Grade Serous Carcinoma	Not variant found	TMR15-0930					Not variant found	Not variant found
230	F	IV	LIMA	LIMA/CALLAO	1936-04-18	2019-05-07	ovarian	High-Grade Serous Carcinoma	Not variant found	TMR15-0931					Not variant found	Not variant found
231	F	IV	LIMA	LIMA/CALLAO	1944-10-26	2019-05-07	ovarian	High-Grade Serous Carcinoma	BRCA2	TMR15-0932	K1132Tfs*11	11	3395_3396delAA	Lys1132Arg	inframe deletion	pathogenic
232	F	III	LA LIBERTAD	COAST	1960-11-22	2019-05-08	ovarian	Low-Grade Serous Carcinoma	BRCA1	TMR15-0933	S1280C	10	3839C>G	Ser1280Cys	missense variant	VUS
234	F	III	LIMA	LIMA/CALLAO	1964-11-10	2019-05-08	ovarian	High-Grade Serous Carcinoma	Not variant found	TMR15-0935					Not variant found	Not variant found
235	F	III	LA LIBERTAD	COAST	1969-01-06	2019-05-09	breast	HER2- RH+	BRCA2	TMR15-0936	N1822I	11	5465A>T	Asn1822Ile	missense variant	VUS
236	F	IV	LIMA	LIMA/CALLAO	1930-02-05	2019-05-10	ovarian	High-Grade Serous Carcinoma	Not variant found	TMR15-0937					Not variant found	Not variant found
238	F	IV	LIMA	LIMA/CALLAO	1967-10-27	2019-05-13	ovarian	High-Grade Serous Carcinoma	BRCA2	TMR15-0943	L366*	10	1097T>G	Leu366*	missense variant	pathogenic
239	F	III	JUNIN	HIGHLANDS	1953-05-30	2019-05-13	ovarian	High-Grade Serous Carcinoma	Not variant found	TMR15-0944					Not variant found	Not variant found
240	F	IV	LIMA	LIMA/CALLAO	1974-09-13	2019-05-13	breast	HER2- RH-	Not variant found	TMR15-0945					Not variant found	Not variant found
241	F	IV	LIMA	LIMA/CALLAO	1956-12-02	2019-05-13	ovarian	High-Grade Serous Carcinoma	Not variant found	TMR15-0946					Not variant found	Not variant found
242	F	IV	LIMA	LIMA/CALLAO	1961-04-28	2019-05-15	ovarian	Clear Cell Carcinoma	Not variant found	TMR15-0949					Not variant found	Not variant found
243	F	IV	ICA	COAST	1959-09-13	2019-05-16	breast	HER2- RH-	BRCA1	TMR15-0952	I31M	3	93C>G	Ile31Met	missense variant	VUS
245	F	IV	LAMBAYEQUE	COAST	1940-04-27	2019-05-28	ovarian	High-Grade Serous Carcinoma	Not variant found	TMR15-0967					Not variant found	Not variant found
246	F	III	PIURA	COAST	1964-04-30	2019-05-28	ovarian	High-Grade Serous Carcinoma	BRCA2	TMR15-0968	V3079Ffs*4	24	9235delG	Val3079Phefs*4	inframe deletion	pathogenic
247	F	IV	LIMA	LIMA/CALLAO	1965-08-11	2019-05-28	ovarian	High-Grade Serous Carcinoma	BRCA2	TMR15-0969	V3079Ffs*4	24	9235delG	Val3079Phefs*4	inframe deletion	pathogenic
248	F	IV	LIMA	LIMA/CALLAO	1954-09-19	2019-05-28	ovarian	Endometrioid Carcinoma	BRCA1	TMR15-0970	L702Ffs*10	10	2105dupT	Leu702Phefs*10	inframe insertion	pathogenic
249	F	IV	LIMA	LIMA/CALLAO	1954-09-19	2019-05-28	ovarian	Endometrioid Carcinoma	BRCA1	TMR15-0970		11		del_exon_11	deletion variant	pathogenic
250	F	III	LIMA	LIMA/CALLAO	1973-03-01	2019-05-28	ovarian	High-Grade Serous Carcinoma	BRCA1	TMR15-0971	C47F	10		del_exon_10	missense variant	pathogenic
251	F	III	ICA	COAST	1944-10-02	2019-05-29	ovarian	High-Grade Serous Carcinoma	Not variant found	TMR15-0973					Not variant found	Not variant found
252	F	IV	LIMA	LIMA/CALLAO	1965-05-16	2019-05-30	breast	HER2- RH-	Not variant found	TMR15-0974					Not variant found	Not variant found
253	F	IV	AREQUIPA	COAST	1943-08-07	2019-05-31	ovarian	High-Grade Serous Carcinoma	BRCA2	TMR15-0976	L2587F	16	7759C>T	Leu258Phe	missense variant	VUS
254	F	IV	LIMA	LIMA/CALLAO	1971-09-04	2019-06-03	breast	HER2- RH-	Not variant found	TMR15-0978					Not variant found	Not variant found
255	F	IV	CALLAO	LIMA/CALLAO	1982-04-01	2019-06-03	ovarian	High-Grade Serous Carcinoma	BRCA1	TMR15-0979	E849Kfs*44	10	2544delA	Glu849Lysfs*44	inframe deletion	pathogenic
256	F	III	LIMA	LIMA/CALLAO	1987-05-05	2019-06-03	ovarian	High-Grade Serous Carcinoma	Not variant found	TMR15-0980					Not variant found	Not variant found
257	F	IV	LIMA	LIMA/CALLAO	1965-02-26	2019-06-03	ovarian	High-Grade Serous Carcinoma	Not variant found	TMR15-0981					Not variant found	Not variant found
258	F	III	UCAYALI	JUNGLE	1981-09-03	2019-06-03	ovarian	High-Grade Serous Carcinoma	BRCA2	TMR15-0983	V1229I	11	3685G>A	Val1229Ile	missense variant	VUS
259	F	IV	LIMA	LIMA/CALLAO	1965-01-12	2019-06-03	ovarian	High-Grade Serous Carcinoma	BRCA1	TMR15-0984	L702Ffs*10	10	2105dupT	Leu702Phefs*10	inframe insertion	pathogenic
260	F	IV	PIURA	COAST	1956-06-08	2019-06-04	ovarian	High-Grade Serous Carcinoma	Not variant found	TMR15-0986					Not variant found	Not variant found
261	F	IV	PIURA	COAST	1957-10-21	2019-06-05	ovarian	High-Grade Serous Carcinoma	Not variant found	TMR15-0987					Not variant found	Not variant found
262	F	III	LIMA	LIMA/CALLAO	1965-11-10	2019-06-05	ovarian	High-Grade Serous Carcinoma	Not variant found	TMR15-0988					Not variant found	Not variant found
265	F	IV	LIMA	LIMA/CALLAO	1961-01-24	2019-06-07	ovarian	High-Grade Serous Carcinoma	Not variant found	TMR15-0993					Not variant found	Not variant found
266	F	IV	LIMA	LIMA/CALLAO	1963-11-13	2019-06-10	ovarian	High-Grade Serous Carcinoma	Not variant found	TMR15-0997					Not variant found	Not variant found
267	F	IV	AREQUIPA	COAST	1954-06-24	2019-06-10	ovarian	High-Grade Serous Carcinoma	BRCA1	TMR15-0998	D96G	5	287A>G	Asp96Gly	missense variant	VUS
269	F	IV	HUANUCO	HIGHLANDS	1962-10-18	2019-06-12	ovarian	High-Grade Serous Carcinoma	Not variant found	TMR15-1004					Not variant found	Not variant found
270	F	III	CUSCO	HIGHLANDS	1973-05-26	2019-06-13	ovarian	High-Grade Serous Carcinoma	Not variant found	TMR15-1005					Not variant found	Not variant found
272	F	IV	AREQUIPA	COAST	1959-05-11	2019-06-14	ovarian	High-Grade Serous Carcinoma	BRCA1	TMR15-1008	K947*	10	2839A>T	Lys94*	missense variant	pathogenic
273	F	IV	CALLAO	LIMA/CALLAO	1967-06-11	2019-06-17	ovarian	Endometrioid Carcinoma	Not variant found	TMR15-1011					Not variant found	Not variant found
274	F	IV	CUSCO	HIGHLANDS	1970-08-28	2019-06-18	ovarian	High-Grade Serous Carcinoma	Not variant found	TMR15-1013					Not variant found	Not variant found
275	F	IV	LA LIBERTAD	COAST	1943-03-20	2019-06-18	ovarian	High-Grade Serous Carcinoma	BRCA2	TMR15-1014			7976+5G>T	splicing intronic	splicing variant	VUS
276	F	III	TACNA	COAST	1979-09-13	2019-06-19	ovarian	Endometrioid Carcinoma	Not variant found	TMR15-1017					Not variant found	Not variant found
277	F	III	LAMBAYEQUE	COAST	1989-07-19	2019-06-19	breast	HER2- RH-	Not variant found	TMR15-1018					Not variant found	Not variant found
279	F	IV	LIMA	LIMA/CALLAO	1948-04-13	2019-06-19	ovarian	High-Grade Serous Carcinoma	Not variant found	TMR15-1020					Not variant found	Not variant found
280	F	III	ICA	COAST	1958-01-10	2019-06-20	ovarian	Clear Cell Carcinoma	BRCA1	TMR15-1021	L1267*	10	3800T>G	Leu1267*	missense variant	pathogenic
282	F	IV	ANCASH	COAST	1942-11-09	2019-06-25	ovarian	High-Grade Serous Carcinoma	BRCA2	TMR15-1024	Q2009Afs*9	11	6024dupG	IGln2009Alafs*9	inframe insertion	pathogenic
283	F	IV	LIMA	LIMA/CALLAO	1962-06-13	2019-06-25	ovarian	High-Grade Serous Carcinoma	Not variant found	TMR15-1025					Not variant found	Not variant found
284	F	IV	LIMA	LIMA/CALLAO	1978-03-30	2019-06-25	breast	HER2- RH-	Not variant found	TMR15-1026					Not variant found	Not variant found
288	F	III	LIMA	LIMA/CALLAO	1942-11-02	2019-06-27	ovarian	High-Grade Serous Carcinoma	BRCA2	TMR15-1033	I2675V	18	8023A>G	Ile2675Val	missense variant	pathogenic
289	F	IV	AREQUIPA	COAST	1965-06-14	2019-07-01	ovarian	High-Grade Serous Carcinoma	BRCA2	TMR15-1037	A2864del	20	8590_8592delGCC	Ala864del	inframe deletion	VUS
290	F	IV	AREQUIPA	COAST	1960-07-08	2019-07-01	ovarian	High-Grade Serous Carcinoma	Not variant found	TMR15-1038					Not variant found	Not variant found
291	F	IV	LIMA	LIMA/CALLAO	1968-07-27	2019-07-02	ovarian	High-Grade Serous Carcinoma	Not variant found	TMR15-1039					Not variant found	Not variant found
294	F	III	LA LIBERTAD	COAST	1959-06-03	2019-07-08	ovarian	High-Grade Serous Carcinoma	Not variant found	TMR15-1046					Not variant found	Not variant found
295	F	III	AREQUIPA	COAST	1944-08-01	2019-07-08	ovarian	High-Grade Serous Carcinoma	Not variant found	TMR15-1047					Not variant found	Not variant found
296	F	IV	LA LIBERTAD	COAST	1985-07-01	2019-07-08	ovarian	High-Grade Serous Carcinoma	Not variant found	TMR15-1048					Not variant found	Not variant found
298	F	III	AYACUCHO	HIGHLANDS	1960-07-25	2019-07-09	ovarian	High-Grade Serous Carcinoma	Not variant found	TMR15-1052					Not variant found	Not variant found
299	F	III	ANCASH	COAST	1993-06-26	2019-07-11	ovarian	High-Grade Serous Carcinoma	Not variant found	TMR15-1056					Not variant found	Not variant found
301	F	IV	LAMBAYEQUE	COAST	1963-03-08	2019-07-15	ovarian	High-Grade Serous Carcinoma	Not variant found	TMR15-1061					Not variant found	Not variant found
302	F	IV	LIMA	LIMA/CALLAO	1974-06-07	2019-07-15	ovarian	High-Grade Serous Carcinoma	BRCA1	TMR15-1062	R1720W	18	5158C>T	Arg1720Trp	missense variant	pathogenic
305	F	IV	LIMA	LIMA/CALLAO	1966-10-11	2019-07-16	ovarian	High-Grade Serous Carcinoma	BRCA2	TMR15-1065	K437Ifs*22	10	1310_1313delAAGA	Lys437Ilefs*22	inframe deletion	pathogenic
306	F	IV	LIMA	LIMA/CALLAO	1977-01-10	2019-07-16	ovarian	High-Grade Serous Carcinoma	Not variant found	TMR15-1066					Not variant found	Not variant found
307	F	IV	LIMA	LIMA/CALLAO	1979-12-26	2019-07-16	ovarian	High-Grade Serous Carcinoma	BRCA2	TMR15-1067	P69T	3	205C>A	Pro69Thr	missense variant	VUS
309	F	III	LIMA	LIMA/CALLAO	1951-08-26	2019-07-17	ovarian	High-Grade Serous Carcinoma	Not variant found	TMR15-1069					Not variant found	Not variant found
311	F	IV	LAMBAYEQUE	COAST	1976-04-27	2019-07-22	ovarian	Clear Cell Carcinoma	Not variant found	TMR15-1073					Not variant found	Not variant found
312	F	III	AYACUCHO	HIGHLANDS	1963-10-25	2019-07-23	ovarian	High-Grade Serous Carcinoma	Not variant found	TMR15-1075					Not variant found	Not variant found
313	F	III	LIMA	LIMA/CALLAO	1956-11-11	2019-07-23	ovarian	High-Grade Serous Carcinoma	Not variant found	TMR15-1076					Not variant found	Not variant found
314	F	IV	PIURA	COAST	1970-03-22	2019-07-23	ovarian	High-Grade Serous Carcinoma	Not variant found	TMR15-1077					Not variant found	Not variant found
315	F	III	ANCASH	COAST	1948-02-04	2019-07-24	ovarian	High-Grade Serous Carcinoma	BRCA1	TMR15-1081	C47F	4	140G>T	Cys47Phe	missense variant	pathogenic
316	F	III	LAMBAYEQUE	COAST	1977-02-08	2019-07-25	ovarian	Clear Cell Carcinoma	Not variant found	TMR15-1084					Not variant found	Not variant found
322	F	IV	LIMA	LIMA/CALLAO	1953-04-02	2019-07-30	ovarian	Endometrioid Carcinoma	BRCA1	TMR15-1091	T884Ifs*18	10	2649_2650delAA	Thr884Ilefs*18	inframe deletion	pathogenic
325	F	III	APURIMAC	HIGHLANDS	1953-11-29	2019-08-01	ovarian	High-Grade Serous Carcinoma	BRCA2	TMR15-1096	L146P	5	437T>A	Leu146Pro	missense variant	VUS
326	F	IV	LIMA	LIMA/CALLAO	1968-03-16	2019-08-05	ovarian	High-Grade Serous Carcinoma	Not variant found	TMR15-1098					Not variant found	Not variant found
329	F	III	LIMA	LIMA/CALLAO	1975-08-10	2019-08-08	ovarian	Endometrioid Carcinoma	Not variant found	TMR15-1101					Not variant found	Not variant found
330	F	IV	LIMA	LIMA/CALLAO	1971-10-25	2019-08-08	ovarian	Clear Cell Carcinoma	BRCA1	TMR15-1102	A1708E	17	5123C>A	Ala1708Glu	missense variant	pathogenic
334	F	IV	ANCASH	COAST	1954-01-13	2019-08-14	ovarian	High-Grade Serous Carcinoma	Not variant found	TMR15-1111					Not variant found	Not variant found
335	F	III	HUANUCO	HIGHLANDS	1955-09-18	2019-08-15	ovarian	High-Grade Serous Carcinoma	BRCA1	TMR15-1112	T276Afs*14	10	815_824dupAGCCATGTGG	Thr276Alafs*14	inframe insertion	pathogenic
337	F	IV	LIMA	LIMA/CALLAO	1946-06-27	2019-08-19	ovarian	High-Grade Serous Carcinoma	BRCA1	TMR15-1120	I21Rfs*18	2	62_68delTCTTA	Ile21Argfs*18	inframe deletion	pathogenic
338	F	IV	LIMA	LIMA/CALLAO	1971-08-16	2019-08-21	ovarian	High-Grade Serous Carcinoma	Not variant found	TMR15-1122					Not variant found	Not variant found
341	F	IV	LIMA	LIMA/CALLAO	1985-05-13	2019-08-26	ovarian	High-Grade Serous Carcinoma	Not variant found	TMR15-1127					Not variant found	Not variant found
343	F	III	LIMA	LIMA/CALLAO	1964-11-10	2019-08-29	ovarian	High-Grade Serous Carcinoma	BRCA1	TMR15-1130	E1373G	11	4118A>G	Glu1373Gly	missense variant	VUS
344	F	III	LIMA	LIMA/CALLAO	1964-11-10	2019-08-29	ovarian	High-Grade Serous Carcinoma	BRCA1	TMR15-1130	E1353K	10	4057G>A	Glu1353Lys	missense variant	VUS
346	F	IV	LIMA	LIMA/CALLAO		2019-09-04	breast	HER2- RH-	Not variant found	TMR15-1132					Not variant found	Not variant found
347	F	IV	LIMA	LIMA/CALLAO	1966-02-10	2019-09-04	ovarian	Mixto	Not variant found	TMR15-1133					Not variant found	Not variant found
350	F	IV	LIMA	LIMA/CALLAO		2019-09-04	breast	HER2- RH-	Not variant found	TMR15-1136					Not variant found	Not variant found
351	F	IV	LIMA	LIMA/CALLAO	1964-05-28	2019-09-04	ovarian	High-Grade Serous Carcinoma	BRCA2	TMR15-1137	Q2823R	19	8468A>G	Gln2823Arg	missense variant	VUS
352	F	IV	ICA	COAST	1950-03-19	2019-09-05	ovarian	High-Grade Serous Carcinoma	BRCA1	TMR15-1139	R71G	4	211A>G	Arg71Gly	missense variant	likely pathogenic
353	F	III	CUSCO	HIGHLANDS	1974-10-10	2019-09-05	ovarian	High-Grade Serous Carcinoma	Not variant found	TMR15-1140					Not variant found	Not variant found
354	F	IV	LIMA	LIMA/CALLAO	1952-02-24	2019-09-05	ovarian	High-Grade Serous Carcinoma	Not variant found	TMR15-1141					Not variant found	Not variant found
356	F	IV	LIMA	LIMA/CALLAO	1964-11-29	2019-09-06	ovarian	High-Grade Serous Carcinoma	Not variant found	TMR15-1143					Not variant found	Not variant found
357	F	IV	LIMA	LIMA/CALLAO	1949-07-10	2019-09-09	ovarian	High-Grade Serous Carcinoma	Not variant found	TMR15-1146					Not variant found	Not variant found
359	F	IV	LIMA	LIMA/CALLAO	1956-11-25	2019-09-11	ovarian	High-Grade Serous Carcinoma	Not variant found	TMR15-1150					Not variant found	Not variant found
360	F	III	LIMA	LIMA/CALLAO	1990-06-19	2019-09-11	breast	HER2- RH-	Not variant found	TMR15-1151					Not variant found	Not variant found
361	F	III	AYACUCHO	HIGHLANDS	1963-05-07	2019-09-23	ovarian	High-Grade Serous Carcinoma	BRCA1	TMR15-1162	N567Kfs*3	10	1700dupA	Asn567Lysfs*3	inframe insertion	pathogenic
362	F	III	HUANUCO	HIGHLANDS	1951-12-07	2019-09-23	breast	HER2- RH-	BRCA2	TMR15-1163	I2821T	19	8462T>C	Ile2821Thr	missense variant	VUS
365	F	IV	LIMA	LIMA/CALLAO	1993-06-16	2019-09-23	ovarian	High-Grade Serous Carcinoma	Not variant found	TMR15-1166					Not variant found	Not variant found
366	F	IV	LIMA	LIMA/CALLAO	1954-03-15	2019-09-23	breast	HER2- RH-	Not variant found	TMR15-1167					Not variant found	Not variant found
367	F	IV	LIMA	LIMA/CALLAO	1960-01-29	2019-09-23	breast	HER2- RH-	Not variant found	TMR15-1168					Not variant found	Not variant found
368	F	IV	LIMA	LIMA/CALLAO	1966-02-06	2019-09-23	ovarian	High-Grade Serous Carcinoma	Not variant found	TMR15-1169					Not variant found	Not variant found
371	F	IV	JUNIN	HIGHLANDS	1958-12-16	2019-09-23	ovarian	High-Grade Serous Carcinoma	Not variant found	TMR15-1172					Not variant found	Not variant found
372	F	IV	LIMA	LIMA/CALLAO	1983-02-24	2019-09-23	breast	HER2- RH-	BRCA1	TMR15-1173	L702Ffs*10	10	2105dupT	Leu702Phefs*10	inframe insertion	pathogenic
373	F	IV	LIMA	LIMA/CALLAO	1971-01-30	2019-09-23	ovarian	High-Grade Serous Carcinoma	Not variant found	TMR15-1174					Not variant found	Not variant found
374	F	IV	LIMA	LIMA/CALLAO	1965-03-09	2019-09-23	breast	HER2- RH-	Not variant found	TMR15-1175					Not variant found	Not variant found
375	F	III	LAMBAYEQUE	COAST	1971-01-22	2019-09-23	ovarian	Endometrioid Carcinoma	BRCA2	TMR15-1176	I2675V	18	8023A>G	Ile2675Val	missense variant	pathogenic
376	F	III	LIMA	LIMA/CALLAO	1973-05-13	2019-09-24	ovarian	High-Grade Serous Carcinoma	BRCA2	TMR15-1177	G1892S	11	5674G>A	Gly1892Ser	missense variant	VUS
377	F	III	AREQUIPA	COAST	1956-09-20	2019-09-24	ovarian	High-Grade Serous Carcinoma	Not variant found	TMR15-1178					Not variant found	Not variant found
379	F	III	LIMA	LIMA/CALLAO	1959-11-03	2019-09-26	ovarian	High-Grade Serous Carcinoma	Not variant found	TMR15-1181					Not variant found	Not variant found
381	F	IV	LIMA	LIMA/CALLAO	1974-11-30	2019-10-02	breast	HER2- RH-	Not variant found	TMR15-1188					Not variant found	Not variant found
382	F	IV	LIMA	LIMA/CALLAO	1980-04-15	2019-10-02	breast	HER2- RH-	Not variant found	TMR15-1189					Not variant found	Not variant found
385	F	III	AREQUIPA	COAST	1968-11-10	2019-10-07	ovarian	High-Grade Serous Carcinoma	Not variant found	TMR15-1196					Not variant found	Not variant found
386	F	IV	LIMA	LIMA/CALLAO	1974-05-17	2019-10-07	breast	HER2- RH-	Not variant found	TMR15-1197					Not variant found	Not variant found
388	F	IV	LIMA	LIMA/CALLAO	1966-11-24	2019-10-07	ovarian	High-Grade Serous Carcinoma	BRCA1	TMR15-1200	A1708E	17	5123C>A	Ala1708Glu	missense variant	pathogenic
389	F	III	LIMA	LIMA/CALLAO		2019-10-09	breast	HER2- RH-	Not variant found	TMR15-1201					Not variant found	Not variant found
390	F	IV	LIMA	LIMA/CALLAO	1970-01-19	2019-10-09	breast	HER2- RH-	Not variant found	TMR15-1205					Not variant found	Not variant found
393	F	III	LIMA	LIMA/CALLAO	1978-10-21	2019-10-14	ovarian	High-Grade Serous Carcinoma	Not variant found	TMR15-1216					Not variant found	Not variant found
394	F	IV	LIMA	LIMA/CALLAO	1943-07-17	2019-10-14	breast	HER2- RH-	Not variant found	TMR15-1217					Not variant found	Not variant found
395	F	IV	LIMA	LIMA/CALLAO	1948-01-01	2019-10-14	ovarian	High-Grade Serous Carcinoma	Not variant found	TMR15-1218					Not variant found	Not variant found
396	F	IV	LIMA	LIMA/CALLAO	1965-04-10	2019-10-14	ovarian	High-Grade Serous Carcinoma	Not variant found	TMR15-1219					Not variant found	Not variant found
397	F	III	LIMA	LIMA/CALLAO	1964-06-08	2019-10-16	ovarian	High-Grade Serous Carcinoma	BRCA2	TMR15-1221	S1001Ffs*8	11	3001dupT	Ser1001Phefs*8	inframe insertion	pathogenic
398	F	III	PIURA	COAST	1988-05-26	2019-10-17	breast	HER2- RH-	Not variant found	TMR15-1224					Not variant found	Not variant found
399	F	IV	LIMA	LIMA/CALLAO	1950-12-21	2019-10-17	ovarian	High-Grade Serous Carcinoma	Not variant found	TMR15-1225					Not variant found	Not variant found
400	F	III	LIMA	LIMA/CALLAO	1934-12-23	2019-10-17	ovarian	High-Grade Serous Carcinoma	Not variant found	TMR15-1226					Not variant found	Not variant found
401	F	III	PIURA	COAST	1968-06-07	2019-10-17	ovarian	High-Grade Serous Carcinoma	BRCA1	TMR15-1227	P968Lfs*33	10	2901_2902dupTC	Pro968Leufs*33	inframe insertion	pathogenic
404	F	III	LIMA	LIMA/CALLAO	1970-05-08	2019-10-21	ovarian	High-Grade Serous Carcinoma	Not variant found	TMR15-1231					Not variant found	Not variant found
407	F	IV	APURIMAC	HIGHLANDS	1946-04-20	2019-10-21	ovarian	High-Grade Serous Carcinoma	Not variant found	TMR15-1234					Not variant found	Not variant found
408	F	IV	LIMA	LIMA/CALLAO	1965-10-23	2019-10-21	ovarian	High-Grade Serous Carcinoma	BRCA1	TMR15-1235	L702Ffs*10	10	2105dupT	Leu702Phefs*10	inframe insertion	pathogenic
409	F	IV	LIMA	LIMA/CALLAO	1957-01-30	2019-10-21	ovarian	High-Grade Serous Carcinoma	Not variant found	TMR15-1236					Not variant found	Not variant found
410	F	IV	PIURA	COAST	1971-11-02	2019-10-21	ovarian	High-Grade Serous Carcinoma	Not variant found	TMR15-1237					Not variant found	Not variant found
411	F	IV	CAJAMARCA	HIGHLANDS	1964-05-19	2019-10-22	ovarian	High-Grade Serous Carcinoma	Not variant found	TMR15-1238					Not variant found	Not variant found
412	F	IV	AMAZONAS	JUNGLE	1946-02-06	2019-10-23	ovarian	High-Grade Serous Carcinoma	Not variant found	TMR15-1242					Not variant found	Not variant found
413	F	IV	CAJAMARCA	HIGHLANDS	1972-09-17	2019-10-24	breast	HER2- RH+	Not variant found	TMR15-1243					Not variant found	Not variant found
414	F	III	LIMA	LIMA/CALLAO	1956-07-24	2019-10-25	ovarian	High-Grade Serous Carcinoma	Not variant found	TMR15-1245					Not variant found	Not variant found
415	F	IV	LIMA	LIMA/CALLAO	1967-01-07	2019-10-28	ovarian	High-Grade Serous Carcinoma	Not variant found	TMR15-1246					Not variant found	Not variant found
416	F	III	LIMA	LIMA/CALLAO	2019-10-29	2019-10-29	ovarian	High-Grade Serous Carcinoma	Not variant found	TMR15-1248					Not variant found	Not variant found
417	F	IV	PIURA	COAST	1962-10-02	2019-10-29	breast	HER2- RH-	Not variant found	TMR15-1249					Not variant found	Not variant found
419	F	IV	LIMA	LIMA/CALLAO	1953-08-06	2019-10-30	breast	HER2- RH+	BRCA2	TMR15-1252			7617+6T>C	Splice region	splicing variant	VUS
420	F	IV	LIMA	LIMA/CALLAO	1959-10-08	2019-10-31	breast	HER2- RH+	BRCA2	TMR15-1254	E2918*	21	8752G>T	Glu2918*	missense variant	pathogenic
421	F	III	LA LIBERTAD	COAST	1968-02-04	2019-10-31	ovarian	High-Grade Serous Carcinoma	Not variant found	TMR15-1255					Not variant found	Not variant found
422	F	III	PIURA	COAST	1953-03-11	2019-11-05	ovarian	High-Grade Serous Carcinoma	Not variant found	TMR15-1256					Not variant found	Not variant found
425	F	IV	CUSCO	HIGHLANDS	1963-10-11	2019-11-12	ovarian	High-Grade Serous Carcinoma	Not variant found	TMR15-1261					Not variant found	Not variant found
426	F	III	LIMA	LIMA/CALLAO	1961-01-24	2019-11-13	ovarian	High-Grade Serous Carcinoma	BRCA2	TMR15-1262	L1768Rfs*5	11	5303_5304delTT	Leu1768Argfs*5	inframe deletion	pathogenic
430	F	III	LIMA	LIMA/CALLAO		2019-11-15	breast	HER2- RH-	Not variant found	TMR15-1269					Not variant found	Not variant found
431	F	III	HUANUCO	HIGHLANDS	1965-09-20	2019-11-15	breast	HER2- RH-	BRCA2	TMR15-1270	N1822I	11	5465A>T	Asn1822Ile	missense variant	VUS
432	F	III	MADRE DE DIOS	JUNGLE	1959-07-29	2019-11-19	ovarian	High-Grade Serous Carcinoma	Not variant found	TMR15-1273					Not variant found	Not variant found
433	F	IV	LIMA	LIMA/CALLAO	1947-03-12	2019-11-21	breast	HER2- RH-	Not variant found	TMR15-1274					Not variant found	Not variant found
434	F	IV	ICA	COAST	1955-03-29	2019-11-21	breast	HER2- RH-	Not variant found	TMR15-1275					Not variant found	Not variant found
435	F	IV	LIMA	LIMA/CALLAO	1961-11-04	2019-11-22	breast	HER2- RH-	Not variant found	TMR15-1276					Not variant found	Not variant found
436	F	IV	ICA	COAST	1952-09-05	2019-11-21	breast	HER2- RH+	Not variant found	TMR15-1279					Not variant found	Not variant found
437	F	IV	LIMA	LIMA/CALLAO	1941-02-24	2019-11-22	ovarian	High-Grade Serous Carcinoma	Not variant found	TMR15-1280					Not variant found	Not variant found
438	F	IV	AMAZONAS	JUNGLE	1952-05-14	2019-11-22	ovarian	High-Grade Serous Carcinoma	Not variant found	TMR15-1281					Not variant found	Not variant found
441	F	IV	AREQUIPA	COAST	1938-09-30	2019-11-29	breast	HER2- RH-	Not variant found	TMR15-1288					Not variant found	Not variant found
443	F	III	LIMA	LIMA/CALLAO	1954-12-15	2019-11-29	ovarian	High-Grade Serous Carcinoma	Not variant found	TMR15-1291					Not variant found	Not variant found
444	F	IV	LIMA	LIMA/CALLAO	1979-05-03	2019-12-04	ovarian	High-Grade Serous Carcinoma	BRCA2	TMR15-1299	V1229I	11	3685G>A	Val1229Ile	missense variant	VUS
445	F	III	LA LIBERTAD	COAST	1968-07-07	2019-12-06	ovarian	High-Grade Serous Carcinoma	BRCA1	TMR15-1302	K739*	10	2215A>T	Lys739*	missense variant	pathogenic
446	F	IV	CALLAO	LIMA/CALLAO	1980-11-23	2019-12-06	ovarian	Papilar	Not variant found	TMR15-1303					Not variant found	Not variant found
447	F	IV	LIMA	LIMA/CALLAO	1975-08-23	2019-12-06	ovarian	High-Grade Serous Carcinoma	Not variant found	TMR15-1304					Not variant found	Not variant found
449	F	IV	LIMA	LIMA/CALLAO	1966-01-13	2019-12-11	breast	HER2- RH+	Not variant found	TMR15-1309					Not variant found	Not variant found
451	F	IV	PIURA	COAST	1939-04-28	2019-12-16	ovarian	High-Grade Serous Carcinoma	Not variant found	TMR15-1315					Not variant found	Not variant found
452	F	IV	LIMA	LIMA/CALLAO	1953-05-27	2019-12-16	ovarian	High-Grade Serous Carcinoma	Not variant found	TMR15-1316					Not variant found	Not variant found
455	F	III	ANCASH	COAST	1955-02-19	2019-12-19	ovarian	High-Grade Serous Carcinoma	BRCA2	TMR15-1322	Q2009Afs*9	11	6024dupG	Gln2009Alafs*9	inframe insertion	pathogenic
457	F	III	LIMA	LIMA/CALLAO	1977-06-26	2019-12-20	breast	HER2- RH+	Not variant found	TMR15-1324					Not variant found	Not variant found
459	F	III	LIMA	LIMA/CALLAO	1970-08-01	2019-12-26	ovarian	High-Grade Serous Carcinoma	BRCA1	TMR15-1339	E84*	5	250G>T	Glu84*	missense variant	pathogenic
462	F	IV	CAJAMARCA	HIGHLANDS	1973-05-18	2020-01-08	ovarian	High-Grade Serous Carcinoma	Not variant found	TMR15-1351					Not variant found	Not variant found
463	F	III	LIMA	LIMA/CALLAO	1977-04-21	2020-01-08	ovarian	High-Grade Serous Carcinoma	Not variant found	TMR15-1352					Not variant found	Not variant found
464	F	IV	LIMA	LIMA/CALLAO	1977-09-24	2020-01-09	breast	HER2- RH+	Not variant found	TMR15-1353					Not variant found	Not variant found
466	F	III	AREQUIPA	COAST	1961-02-18	2020-01-13	ovarian	High-Grade Serous Carcinoma	Not variant found	TMR15-1356					Not variant found	Not variant found
467	F	III	AMAZONAS	JUNGLE	1951-12-21	2020-01-16	ovarian	High-Grade Serous Carcinoma	Not variant found	TMR15-1364					Not variant found	Not variant found
469	F	IV	ICA	COAST	1958-03-08	2020-01-24	breast	HER2- RH-	Not variant found	TMR15-1377					Not variant found	Not variant found
472	F	III	CAJAMARCA	HIGHLANDS	1982-08-23	2020-02-17	ovarian	High-Grade Serous Carcinoma	BRCA1	TMR15-1389	C47F	4	140G>T	Cys47Phe	missense variant	pathogenic
473	F	IV	LIMA	LIMA/CALLAO	1957-12-14	2020-02-17	ovarian	Clear Cell Carcinoma	BRCA2	TMR15-1394	D3062G	24	9185A>G	Asp3062Gly	missense variant	VUS
474	F	III	LIMA	LIMA/CALLAO	1951-05-08	2020-02-17	ovarian	Endometrioid Carcinoma	BRCA2	TMR15-1395	I975S	11	2924T>G	Ile975Ser	missense variant	VUS
475	F	III	LIMA	LIMA/CALLAO	1971-11-20	2020-02-17	ovarian	High-Grade Serous Carcinoma	BRCA1	TMR15-1396	T276Afs*14	10	815_824dupAGCCATGTGG	Thr276Alafs*14	inframe insertion	pathogenic
476	F	IV	LIMA	LIMA/CALLAO	1953-05-27	2020-02-20	ovarian	High-Grade Serous Carcinoma	Not variant found	TMR15-1404					Not variant found	Not variant found
477	F	IV	LIMA	LIMA/CALLAO	1953-12-23	2020-02-20	ovarian	High-Grade Serous Carcinoma	Not variant found	TMR15-1406					Not variant found	Not variant found
478	F	IV	LIMA	LIMA/CALLAO	1977-01-10	2020-02-20	ovarian	High-Grade Serous Carcinoma	Not variant found	TMR15-1407					Not variant found	Not variant found
481	F	IV	TUMBES	COAST	1978-10-25	2020-02-24	ovarian	High-Grade Serous Carcinoma	BRCA1	TMR15-1411	V923Lfs*77	10	2766delA	Val923Leufs*77	inframe deletion	pathogenic
484	F	IV	LIMA	LIMA/CALLAO	1963-11-06	2020-02-27	ovarian	High-Grade Serous Carcinoma	Not variant found	TMR15-1420					Not variant found	Not variant found
485	F	IV	LIMA	LIMA/CALLAO	1954-07-22	2020-02-27	ovarian	High-Grade Serous Carcinoma	BRCA2	TMR15-1421	Y1710*	11	5130_5133delTGTA	Tyr1710*	inframe deletion	pathogenic
486	F	IV	LA LIBERTAD	COAST	1943-02-27	2020-02-27	ovarian	High-Grade Serous Carcinoma	Not variant found	TMR15-1422					Not variant found	Not variant found
488	F	IV	LIMA	LIMA/CALLAO	1967-10-08	2020-02-27	ovarian	High-Grade Serous Carcinoma	Not variant found	TMR15-1425					Not variant found	Not variant found
489	F	III	LIMA	LIMA/CALLAO	1967-09-26	2020-02-28	ovarian	High-Grade Serous Carcinoma	BRCA1	TMR15-1427	R1495M	13	4484G>T	Arg1495Met	missense variant	pathogenic
490	F	III	LIMA	LIMA/CALLAO	1961-08-27	2020-03-02	ovarian	High-Grade Serous Carcinoma	BRCA2	TMR15-1431	T3085Nfs*26	24	9253dupA	Thr3085Asnfs*26	inframe insertion	pathogenic
491	F	IV	LIMA	LIMA/CALLAO	1966-12-16	2020-03-02	breast	HER2- RH+	Not variant found	TMR15-1432					Not variant found	Not variant found
493	F	IV	JUNIN	HIGHLANDS	1963-06-06	2020-03-03	ovarian	High-Grade Serous Carcinoma	Not variant found	TMR15-1434					Not variant found	Not variant found
495	F	III	LIMA	LIMA/CALLAO	1977-01-02	2020-03-09	ovarian	High-Grade Serous Carcinoma	Not variant found	TMR15-1444					Not variant found	Not variant found
496	F	III	LIMA	LIMA/CALLAO	1960-03-02	2020-03-12	ovarian	High-Grade Serous Carcinoma	Not variant found	TMR15-1445					Not variant found	Not variant found
499	F	III	ICA	COAST	1963-09-21	2020-03-18	ovarian	High-Grade Serous Carcinoma	BRCA1	TMR15-1451	N1002Tfs*22	10	3005delA	Asn1002Thrfs*22	inframe deletion	pathogenic
500	F	IV	PIURA	COAST	1977-09-15	2020-03-18	ovarian	Clear Cell Carcinoma	Not variant found	TMR15-1452					Not variant found	Not variant found
501	F	IV	PIURA	COAST	1967-02-10	2020-03-18	ovarian	High-Grade Serous Carcinoma	BRCA1	TMR15-1453	K654Sfs*47	10	1961delA	Lys654Serfs*47	inframe deletion	pathogenic
502	F	IV	LIMA	LIMA/CALLAO	1972-01-29	2020-03-18	ovarian	High-Grade Serous Carcinoma	Not variant found	TMR15-1454					Not variant found	Not variant found
503	F	IV	MOQUEGUA	COAST	1956-09-29	2020-03-18	ovarian	High-Grade Serous Carcinoma	Not variant found	TMR15-1455					Not variant found	Not variant found
505	F	IV	LIMA	LIMA/CALLAO		2020-04-02	breast	HER2- RH-	Not variant found	TMR15-1459					Not variant found	Not variant found
506	F	III	LIMA	LIMA/CALLAO	1977-03-26	2020-04-08	ovarian	High-Grade Serous Carcinoma	Not variant found	TMR15-1460					Not variant found	Not variant found
507	F	IV	LIMA	LIMA/CALLAO	1953-12-23	2020-04-08	ovarian	High-Grade Serous Carcinoma	Not variant found	TMR15-1461					Not variant found	Not variant found
510	F	III	LIMA	LIMA/CALLAO	1986-01-27	2020-04-16	breast	HER2- RH+	Not variant found	TMR15-1467					Not variant found	Not variant found
511	F	IV	LIMA	LIMA/CALLAO	1976-02-28	2020-04-20	breast	HER2- RH-	Not variant found	TMR15-1470					Not variant found	Not variant found
513	F	III	LIMA	LIMA/CALLAO	1956-09-29	2020-05-04	breast	HER2- RH-	Not variant found	TMR15-1482					Not variant found	Not variant found
514	F	III	LIMA	LIMA/CALLAO	1956-11-19	2020-05-04	ovarian	High-Grade Serous Carcinoma	Not variant found	TMR15-1483					Not variant found	Not variant found
515	F	IV	LIMA	LIMA/CALLAO	1973-01-28	2020-05-04	breast	HER2- RH-	Not variant found	TMR15-1484					Not variant found	Not variant found
516	F	IV	LIMA	LIMA/CALLAO	1984-03-01	2020-05-04	ovarian	High-Grade Serous Carcinoma	Not variant found	TMR15-1485					Not variant found	Not variant found
517	F	IV	LIMA	LIMA/CALLAO	1966-07-06	2020-05-04	ovarian	High-Grade Serous Carcinoma	BRCA2	TMR15-1486	Y3009Sfs*7	23	9026_9030delATCAT	Tyr3009Serfs*7	inframe deletion	pathogenic
518	F	III	LIMA	LIMA/CALLAO	04/01/1944	2020-05-06	ovarian	High-Grade Serous Carcinoma	Not variant found	TMR15-1489					Not variant found	Not variant found
519	F	IV	HUANUCO	HIGHLANDS	1983-10-30	2020-05-11	breast	HER2- RH-	Not variant found	TMR15-1490					Not variant found	Not variant found
520	F	IV	LIMA	LIMA/CALLAO	1978-06-20	2020-05-12	breast	HER2- RH-	Not variant found	TMR15-1492					Not variant found	Not variant found
521	F	IV	LIMA	LIMA/CALLAO	1985-08-06	2020-05-12	breast	HER2- RH-	Not variant found	TMR15-1493					Not variant found	Not variant found
522	F	IV	LIMA	LIMA/CALLAO	1952-03-26	2020-05-12	breast	HER2- RH-	Not variant found	TMR15-1494					Not variant found	Not variant found
523	F	III	LIMA	LIMA/CALLAO	1975-06-29	2020-05-12	ovarian	High-Grade Serous Carcinoma	Not variant found	TMR15-1495					Not variant found	Not variant found
524	F	IV	LIMA	LIMA/CALLAO	1971-08-24	2020-05-12	ovarian	High-Grade Serous Carcinoma	Not variant found	TMR15-1496					Not variant found	Not variant found
525	F	IV	LIMA	LIMA/CALLAO	1956-09-14	2020-05-12	breast	HER2- RH-	Not variant found	TMR15-1497					Not variant found	Not variant found
529	F	III	LIMA	LIMA/CALLAO	1960-12-26	2020-05-26	ovarian	High-Grade Serous Carcinoma	Not variant found	TMR15-1511					Not variant found	Not variant found
532	F	IV	LIMA	LIMA/CALLAO	1954-03-30	2020-06-04	breast	HER2- RH-	Not variant found	TMR15-1518					Not variant found	Not variant found
533	F	III	LIMA	LIMA/CALLAO	1968-07-07	2020-06-04	ovarian	High-Grade Serous Carcinoma	Not variant found	TMR15-1519					Not variant found	Not variant found
535	F	IV	LIMA	LIMA/CALLAO		2020-06-08	breast	HER2- RH-	Not variant found	TMR15-1523					Not variant found	Not variant found
536	F	III	LIMA	LIMA/CALLAO	1964-09-11	2020-06-08	ovarian	High-Grade Serous Carcinoma	BRCA2	TMR15-1524	V2151Sfs*25	11	6450dupA	Val2151Serfs*25	inframe insertion	pathogenic
537	F	III	LIMA	LIMA/CALLAO	1964-09-11	2020-06-08	ovarian	High-Grade Serous Carcinoma	BRCA2	TMR15-1524	A2231G	11	6692C>G	Ala2231Gly	missense variant	VUS
538	F	III	LIMA	LIMA/CALLAO	1965-05-04	2020-06-15	ovarian	High-Grade Serous Carcinoma	BRCA2	TMR15-1529	K410*	10	1228A>T	Lys410*	missense variant	pathogenic
539	F	IV	LIMA	LIMA/CALLAO		2020-06-15	ovarian	High-Grade Serous Carcinoma	Not variant found	TMR15-1530					Not variant found	Not variant found
541	F	III	AREQUIPA	COAST	1966-02-12	2020-06-18	breast	HER2- RH-	Not variant found	TMR15-1532					Not variant found	Not variant found
542	F	IV	LIMA	LIMA/CALLAO	1980-08-23	2020-06-22	breast	HER2- RH+	Not variant found	TMR15-1536					Not variant found	Not variant found
543	F	III	LIMA	LIMA/CALLAO	1989-10-22	2020-06-25	breast	HER2- RH+	BRCA2	TMR15-1540	K2673R	18	8018A>G	Lys2673Arg	missense variant	VUS
544	F	III	AREQUIPA	COAST	1970-04-08	2020-06-26	ovarian	High-Grade Serous Carcinoma	Not variant found	TMR15-1541					Not variant found	Not variant found
545	F	IV	LIMA	LIMA/CALLAO	1981-11-05	2020-06-30	ovarian	High-Grade Serous Carcinoma	BRCA1	TMR15-1542	E23Vfs*17	2	68_69delAG	Glu23Valfs*17	inframe deletion	pathogenic
546	F	III	LIMA	LIMA/CALLAO	1937-03-10	2020-06-30	ovarian	High-Grade Serous Carcinoma	Not variant found	TMR15-1544					Not variant found	Not variant found
548	F	IV	LIMA	LIMA/CALLAO	1972-07-08	2020-07-02	ovarian	High-Grade Serous Carcinoma	Not variant found	TMR15-1546					Not variant found	Not variant found
549	F	III	LIMA	LIMA/CALLAO	1979-12-06	2020-07-02	ovarian	High-Grade Serous Carcinoma	Not variant found	TMR15-1547					Not variant found	Not variant found
550	F	IV	LIMA	LIMA/CALLAO	1969-06-15	2020-07-06	ovarian	High-Grade Serous Carcinoma	Not variant found	TMR15-1551					Not variant found	Not variant found
551	F	IV	CAJAMARCA	HIGHLANDS	1982-08-23	2020-07-08	ovarian	High-Grade Serous Carcinoma	BRCA1	TMR15-1555	C47F	4	140G>T	Cys47Phe	missense variant	pathogenic
552	F	III	LIMA	LIMA/CALLAO		2020-07-08	ovarian	High-Grade Serous Carcinoma	Not variant found	TMR15-1556					Not variant found	Not variant found
553	F	IV	AREQUIPA	COAST	1963-05-08	2020-07-09	ovarian	Endometrioid Carcinoma	BRCA1	TMR15-1557	S782Kfs*8	10	2344dupA	Ser782Lysfs*8	inframe insertion	pathogenic
554	F	IV	CALLAO	LIMA/CALLAO	1979-01-11	2020-07-14	breast	HER2- RH-	Not variant found	TMR15-1563					Not variant found	Not variant found
555	F	III	LIMA	LIMA/CALLAO	1967-10-25	2020-07-14	breast	HER2- RH-	BRCA2	TMR15-1564	Y600Rfs*14	10	797_1801delTTATA	Tyr600Argfs*14	inframe deletion	pathogenic
556	F	IV	LA LIBERTAD	COAST	1978-10-27	2020-07-16	breast	HER2- RH-	BRCA2	TMR15-1566	Q3047H	24	9141G>T	Gln3047His	missense variant	VUS
558	F	IV	LIMA	LIMA/CALLAO	1963-11-03	2020-07-20	ovarian	High-Grade Serous Carcinoma	Not variant found	TMR15-1569					Not variant found	Not variant found
559	F	IV	LIMA	LIMA/CALLAO	1961-09-24	2020-07-20	ovarian	High-Grade Serous Carcinoma	BRCA2	TMR15-1570	Q3026Rfs*2	23	9077delA	Gln3026Argfs*2	inframe deletion	pathogenic
561	F	III	PUNO	HIGHLANDS	2020-07-24	2020-07-23	breast	HER2- RH+	Not variant found	TMR15-1582					Not variant found	Not variant found
562	F	III	LAMBAYEQUE	COAST	1966-04-17	2020-07-23	breast	HER2- RH+	Not variant found	TMR15-1583					Not variant found	Not variant found
563	F	III	LAMBAYEQUE	COAST	1937-08-09	2020-07-30	ovarian	High-Grade Serous Carcinoma	Not variant found	TMR15-1587					Not variant found	Not variant found
564	F	III	LIMA	LIMA/CALLAO	1963-03-30	2020-07-30	breast	HER2- RH+	Not variant found	TMR15-1588					Not variant found	Not variant found
565	F	III	AREQUIPA	COAST	1988-08-12	2020-07-31	ovarian	High-Grade Serous Carcinoma	Not variant found	TMR15-1592					Not variant found	Not variant found
566	F	III	LIMA	LIMA/CALLAO	1974-12-30	2020-07-31	breast	HER2- RH+	BRCA2	TMR15-1593	I2675Dfs*6	18	8021dupA	Ile2675Aspfs*6	inframe insertion	pathogenic
567	F	IV	LIMA	LIMA/CALLAO		2020-08-03	ovarian	High-Grade Serous Carcinoma	Not variant found	TMR15-1594					Not variant found	Not variant found
568	F	IV	HUANUCO	HIGHLANDS	1955-08-09	2020-08-04	ovarian	High-Grade Serous Carcinoma	Not variant found	TMR15-1596					Not variant found	Not variant found
569	F	III	APURIMAC	HIGHLANDS	1981-05-30	2020-08-04	breast	HER2- RH+	Not variant found	TMR15-1597					Not variant found	Not variant found
570	F	III	APURIMAC	HIGHLANDS	1979-01-17	2020-08-06	breast	HER2- RH-	Not variant found	TMR15-1600					Not variant found	Not variant found
571	F	III	LIMA	LIMA/CALLAO	1976-10-13	2020-08-13	breast	HER2- RH+	Not variant found	TMR15-1611					Not variant found	Not variant found
572	F	III	LIMA	LIMA/CALLAO	1981-12-16	2020-08-13	ovarian	High-Grade Serous Carcinoma	BRCA1	TMR15-1612	F1226V	10	3676T>G	Phe1226Val	missense variant	VUS
573	F	III	JUNIN	HIGHLANDS	1964-05-27	2020-08-18	ovarian	High-Grade Serous Carcinoma	Not variant found	TMR15-1616					Not variant found	Not variant found
574	F	III	AREQUIPA	COAST	2020-08-20	2020-08-20	ovarian	High-Grade Serous Carcinoma	Not variant found	TMR15-1621					Not variant found	Not variant found
575	F	IV	LIMA	LIMA/CALLAO	1984-07-09	2020-08-25	ovarian	High-Grade Serous Carcinoma	BRCA1	TMR15-1623	R1751*	19	5251C>T	T Arg1751*	missense variant	pathogenic
576	F	IV	LIMA	LIMA/CALLAO	1956-11-14	2020-08-25	ovarian	High-Grade Serous Carcinoma	Not variant found	TMR15-1624					Not variant found	Not variant found
579	F	III	LIMA	LIMA/CALLAO	1981-08-07	2020-08-31	ovarian	High-Grade Serous Carcinoma	BRCA1	TMR15-1633	E23Vfs*17	2	68_69delAG	Glu23Valfs*17	inframe deletion	pathogenic
581	F	IV	LIMA	LIMA/CALLAO	1987-08-18	2020-09-07	breast	HER2- RH-	Not variant found	TMR15-1649					Not variant found	Not variant found
584	F	IV	LORETO	JUNGLE	1959-03-10	2020-09-14	ovarian	High-Grade Serous Carcinoma	Not variant found	TMR15-1659					Not variant found	Not variant found
585	F	IV	LIMA	LIMA/CALLAO	1976-05-29	2020-09-18	ovarian	High-Grade Serous Carcinoma	BRCA1	TMR15-1662	L702Ffs*10	10	2105dupT	Leu702Phefs*10	inframe insertion	pathogenic
586	F	IV	LIMA	LIMA/CALLAO		2020-09-23	breast	HER2- RH-	Not variant found	TMR15-1666					Not variant found	Not variant found
587	F	IV	LIMA	LIMA/CALLAO	1967-09-11	2020-09-25	ovarian	High-Grade Serous Carcinoma	BRCA1	TMR15-1668	L1209*	10	3626T>A	Leu1209*	missense variant	pathogenic
588	F	IV	CALLAO	LIMA/CALLAO	1955-03-21	2020-09-25	ovarian	High-Grade Serous Carcinoma	BRCA2	TMR15-1669	I1034T	11	3101T>C	Ile1034Thr	missense variant	VUS
589	F	IV	LIMA	LIMA/CALLAO	1968-05-05	2020-09-25	ovarian	High-Grade Serous Carcinoma	BRCA1	TMR15-1670	E23Vfs*17	2	68_69delAG	Glu23Valfs*17	inframe deletion	pathogenic
591	F	IV	CALLAO	LIMA/CALLAO		2020-09-25	breast	HER2- RH-	BRCA1	TMR15-1674	R1751*	19	5251C>T	T Arg1751*	missense variant	pathogenic
592	F	IV	LIMA	LIMA/CALLAO		2020-09-29	breast	HER2- RH+	Not variant found	TMR15-1679					Not variant found	Not variant found
593	F	III	AREQUIPA	COAST	2020-09-28	2020-09-29	breast	HER2- RH-	Not variant found	TMR15-1680					Not variant found	Not variant found
594	F	IV	LA LIBERTAD	COAST	1972-03-28	2020-09-29	breast	HER2- RH-	Not variant found	TMR15-1681					Not variant found	Not variant found
595	F	IV	LORETO	JUNGLE	1976-01-21	2020-09-29	breast	HER2- RH-	Not variant found	TMR15-1682					Not variant found	Not variant found
597	F	III	LIMA	LIMA/CALLAO	1967-10-25	2020-09-29	ovarian	High-Grade Serous Carcinoma	BRCA2	TMR15-1684	Y600Rfs*14	10	1797_1801delTTATA	Tyr600Argfs*14	inframe deletion	pathogenic
598	F	IV	LIMA	LIMA/CALLAO	1990-07-30	2020-10-01	breast	HER2- RH-	BRCA1	TMR15-1688	E23_P25del	2	67_75delGAGTGTCCC	Glu23_Pro25del	inframe deletion	likely pathogenic
600	F	IV	LIMA	LIMA/CALLAO	1961-08-25	2020-10-01	ovarian	High-Grade Serous Carcinoma	BRCA2	TMR15-1690	T3085Nfs*26	24	9253dupA	Thr3085Asnfs*26	inframe insertion	pathogenic
601	F	IV	LAMBAYEQUE	COAST	2020-10-07	2020-10-07	breast	HER2- RH-	Not variant found	TMR15-1693					Not variant found	Not variant found
602	F	III	LA LIBERTAD	COAST	1971-09-22	2020-10-07	ovarian	High-Grade Serous Carcinoma	Not variant found	TMR15-1694					Not variant found	Not variant found
603	F	III	LIMA	LIMA/CALLAO	1978-09-02	2020-10-13	breast	HER2- RH-	Not variant found	TMR15-1699					Not variant found	Not variant found
604	F	III	LIMA	LIMA/CALLAO		2020-10-14	breast	HER2- RH+	Not variant found	TMR15-1700					Not variant found	Not variant found
607	F	IV	LIMA	LIMA/CALLAO	1969-05-20	2020-10-14	ovarian	High-Grade Serous Carcinoma	Not variant found	TMR15-1704					Not variant found	Not variant found
609	F	III	LIMA	LIMA/CALLAO		2020-10-15	breast	HER2- RH-	Not variant found	TMR15-1706					Not variant found	Not variant found
611	F	III	LIMA	LIMA/CALLAO	1956-09-14	2020-10-17	ovarian	High-Grade Serous Carcinoma	BRCA1	TMR15-1711	L702Ffs*10	10	2105dupT	Leu702Phefs*10	inframe insertion	pathogenic
612	F	III	LAMBAYEQUE	COAST	1980-10-12	2020-10-20	breast	HER2- RH-	BRCA1	TMR15-1716	C47F	4	140G>T	Cys47Phe	missense variant	pathogenic
613	F	III	LIMA	LIMA/CALLAO	1963-12-17	2020-10-20	ovarian	High-Grade Serous Carcinoma	Not variant found	TMR15-1717					Not variant found	Not variant found
615	F	IV	PIURA	COAST	1957-02-16	2020-10-21	ovarian	High-Grade Serous Carcinoma	Not variant found	TMR15-1719					Not variant found	Not variant found
616	F	III	LA LIBERTAD	COAST	1964-06-12	2020-10-21	ovarian	High-Grade Serous Carcinoma	Not variant found	TMR15-1720					Not variant found	Not variant found
617	F	IV	LAMBAYEQUE	COAST	1964-08-14	2020-10-22	breast	HER2- RH-	Not variant found	TMR15-1725					Not variant found	Not variant found
618	F	IV	PIURA	COAST	1986-06-06	2020-10-23	ovarian	High-Grade Serous Carcinoma	BRCA1	TMR15-1727	K654Sfs*47	10	1961delA	Lys654Serfs*47	inframe deletion	pathogenic
619	F	III	CARABOBO	OTHER	1991-10-30	2020-10-27	breast	HER2- RH-	Not variant found	TMR15-1730					Not variant found	Not variant found
621	F	III	LIMA	LIMA/CALLAO	1971-03-06	2020-10-27	ovarian	High-Grade Serous Carcinoma	Not variant found	TMR15-1732					Not variant found	Not variant found
624	F	IV	LIMA	LIMA/CALLAO	1961-05-08	2020-10-30	ovarian	High-Grade Serous Carcinoma	Not variant found	TMR15-1738					Not variant found	Not variant found
625	F	III	ICA	COAST	1968-07-03	2020-11-02	ovarian	High-Grade Serous Carcinoma	Not variant found	TMR15-1741					Not variant found	Not variant found
626	F	IV	PIURA	COAST	1973-04-26	2020-11-02	breast	HER2- RH-	Not variant found	TMR15-1742					Not variant found	Not variant found
628	F	III	TRUJILLO	COAST	1980-08-24	2020-11-05	breast	HER2- RH-	Not variant found	TMR15-1747					Not variant found	Not variant found
629	F	III	LA LIBERTAD	COAST	1974-09-28	2020-11-06	ovarian	High-Grade Serous Carcinoma	Not variant found	TMR15-1749					Not variant found	Not variant found
630	F	III	LIMA	LIMA/CALLAO	1970-06-10	2020-11-06	breast	HER2- RH-	Not variant found	TMR15-1750					Not variant found	Not variant found
631	F	IV	PIURA	COAST	1968-07-21	2020-11-09	breast	HER2- RH-	Not variant found	TMR15-1753					Not variant found	Not variant found
634	F	III	LIMA	LIMA/CALLAO	1973-08-17	2020-11-10	ovarian	High-Grade Serous Carcinoma	BRCA2	TMR15-1760	I2675V	18	8023A>G	Ile2675Val	missense variant	pathogenic
636	F	III	LIMA	LIMA/CALLAO	1982-04-28	2020-11-18	breast	HER2- RH-	Not variant found	TMR15-1766					Not variant found	Not variant found
639	F	IV	LIMA	LIMA/CALLAO	1984-05-16	2020-11-23	ovarian	Endometrioid Carcinoma	Not variant found	TMR15-1772					Not variant found	Not variant found
642	F	III	LIMA	LIMA/CALLAO	1974-12-03	2020-11-26	ovarian	High-Grade Serous Carcinoma	BRCA1	TMR15-1779	L702Ffs*10	10	2105dupT	Leu702Phefs*10	inframe insertion	pathogenic
648	F	IV	CAJAMARCA	HIGHLANDS	1954-01-17	2020-12-10	ovarian	High-Grade Serous Carcinoma	Not variant found	TMR15-1795					Not variant found	Not variant found
649	F	IV	LAMBAYEQUE	COAST	1973-08-23	2020-12-10	breast	HER2- RH-	Not variant found	TMR15-1796					Not variant found	Not variant found
650	F	I	LIMA	LIMA/CALLAO	1949-06-27	2020-12-10	breast	HER2- RH-	Not variant found	TMR15-1800					Not variant found	Not variant found
652	F	IV	LIMA	LIMA/CALLAO	1973-03-31	2020-12-14	breast	HER2- RH-	Not variant found	TMR15-1808					Not variant found	Not variant found
654	F	III	LIMA	LIMA/CALLAO	1948-02-01	2020-12-15	ovarian	High-Grade Serous Carcinoma	Not variant found	TMR15-1813					Not variant found	Not variant found
655	F	IV	LA LIBERTAD	COAST	1973-03-31	2020-12-21	breast	HER2- RH-	Not variant found	TMR15-1815					Not variant found	Not variant found
656	F	III	LIMA	LIMA/CALLAO	1962-07-31	2020-12-21	ovarian	High-Grade Serous Carcinoma	Not variant found	TMR15-1817					Not variant found	Not variant found
657	F	IV	LIMA	LIMA/CALLAO		2020-12-22	ovarian	High-Grade Serous Carcinoma	Not variant found	TMR15-1823					Not variant found	Not variant found
658	F	III	AREQUIPA	COAST	1950-11-05	2020-12-29	ovarian	High-Grade Serous Carcinoma	Not variant found	TMR15-1828					Not variant found	Not variant found
659	F	IV	LA LIBERTAD	COAST	-	2020-12-29	breast	HER2- RH-	Not variant found	TMR15-1829					Not variant found	Not variant found
660	F	III	LIMA	LIMA/CALLAO	1946-04-26	2021-01-04	ovarian	High-Grade Serous Carcinoma	Not variant found	TMR15-1830					Not variant found	Not variant found
662	F	IV	LA LIBERTAD	COAST	1969-08-06	2021-01-08	breast	HER2- RH-	BRCA1	TMR15-1834	L702Ffs*10	10	2105dupT	Leu702Phefs*10	inframe insertion	pathogenic
663	F	IV	LIMA	LIMA/CALLAO	1969-09-20	2021-01-15	breast	HER2- RH-	BRCA1	TMR15-1842	Q310*	10	928C>T	Gln310*	missense variant	pathogenic
664	F	IV	LIMA	LIMA/CALLAO	1954-01-25	2021-01-18	ovarian	High-Grade Serous Carcinoma	Not variant found	TMR15-1843					Not variant found	Not variant found
665	F	III	LIMA	LIMA/CALLAO	1965-08-30	2021-01-18	ovarian	High-Grade Serous Carcinoma	BRCA1	TMR15-1844	G1560V	15	4679G>T	Gly1560Val	missense variant	VUS
666	F	IV	LIMA	LIMA/CALLAO	1992-08-22	2021-01-20	breast	HER2- RH-	Not variant found	TMR15-1847					Not variant found	Not variant found
667	F	IV	LA LIBERTAD	COAST	1960-10-15	2021-01-22	breast	HER2- RH-	BRCA2	TMR15-1848	V1873*	11	5616delA	Val1873*	inframe deletion	pathogenic
668	F	III	PIURA	COAST	1964-07-07	2021-01-26	breast	HER2- RH-	BRCA1	TMR15-1854	R1443*	12	4327C>T	Arg1443*	missense variant	pathogenic
669	F	III	LIMA	LIMA/CALLAO	1938-12-07	2021-01-27	ovarian	High-Grade Serous Carcinoma	Not variant found	TMR15-1855					Not variant found	Not variant found
670	F	IV	LIMA	LIMA/CALLAO	1958-03-14	2021-01-27	breast	HER2- RH-	BRCA1	TMR15-1856	Q1756Pfs*74	19	5266dupC	Gln1756Profs*74	inframe insertion	pathogenic
671	F	IV	LIMA	LIMA/CALLAO		2021-01-28	breast	HER2- RH-	Not variant found	TMR15-1858					Not variant found	Not variant found
672	F	IV	LIMA	LIMA/CALLAO	1954-02-02	2021-01-29	breast	HER2- RH-	Not variant found	TMR15-1860					Not variant found	Not variant found
673	F	III	CUSCO	HIGHLANDS		2021-01-29	breast	HER2- RH-	BRCA2	TMR15-1862	I2675V	18	8023A>G	Ile2675Val	missense variant	pathogenic
674	F	III	LIMA	LIMA/CALLAO	1972-09-27	2021-02-05	breast	HER2- RH-	Not variant found	TMR15-1869					Not variant found	Not variant found
675	F	III	CUSCO	HIGHLANDS	1940-10-01	2021-02-05	ovarian	High-Grade Serous Carcinoma	Not variant found	TMR15-1870					Not variant found	Not variant found
676	F	III	LIMA	LIMA/CALLAO	1957-02-11	2021-02-06	ovarian	High-Grade Serous Carcinoma	Not variant found	TMR15-1871					Not variant found	Not variant found
678	F	III	LIMA	LIMA/CALLAO	1973-04-22	2021-02-26	breast	HER2- RH-	Not variant found	TMR15-1882					Not variant found	Not variant found
679	F	IV	LIMA	LIMA/CALLAO		2021-02-26	ovarian	High-Grade Serous Carcinoma	BRCA2	TMR15-1888	I2675V	18	8023A>G	Ile2675Val	missense variant	pathogenic
680	F	III	LIMA	LIMA/CALLAO	1969-08-16	2021-03-01	ovarian	High-Grade Serous Carcinoma	Not variant found	TMR15-1890					Not variant found	Not variant found
682	F	III	LAMBAYEQUE	COAST	1961-02-06	2021-03-05	ovarian	Papilar	Not variant found	TMR15-1900					Not variant found	Not variant found
684	F	IV	LIMA	LIMA/CALLAO	1969-01-09	2021-03-05	ovarian	High-Grade Serous Carcinoma	Not variant found	TMR15-1902					Not variant found	Not variant found
687	F	IV	LIMA	LIMA/CALLAO	1951-01-08	2021-03-15	breast	HER2- RH-	Not variant found	TMR15-1906					Not variant found	Not variant found
688	F	III	LA LIBERTAD	COAST	1982-06-13	2021-03-15	breast	HER2- RH+	BRCA2	TMR15-1907	Q2009Afs*9	11	6024dupG	Gln2009Alafs*9	inframe insertion	pathogenic
689	F	IV	AREQUIPA	COAST	1977-03-19	2021-03-16	breast	HER2- RH-	Not variant found	TMR15-1912					Not variant found	Not variant found
690	F	IV	LA LIBERTAD	COAST	1984-03-14	2021-03-16	breast	HER2- RH-	BRCA1	TMR15-1913	A1708E	17	5123C>A	Ala1708Glu	missense variant	pathogenic
691	F	III	LIMA	LIMA/CALLAO	1980-12-13	2021-03-16	breast	HER2- RH-	Not variant found	TMR15-1914					Not variant found	Not variant found
692	F	IV	LIMA	LIMA/CALLAO	1954-12-04	2021-03-18	breast	HER2- RH-	Not variant found	TMR15-1915					Not variant found	Not variant found
693	F	IV	LIMA	LIMA/CALLAO	2021-03-19	2021-03-19	breast	HER2- RH-	Not variant found	TMR15-1917					Not variant found	Not variant found
694	F	III	LIMA	LIMA/CALLAO	1977-06-30	2021-03-19	ovarian	High-Grade Serous Carcinoma	Not variant found	TMR15-1921					Not variant found	Not variant found
697	F	IV	LIMA	LIMA/CALLAO		2021-03-26	ovarian	High-Grade Serous Carcinoma	Not variant found	TMR15-1928					Not variant found	Not variant found
699	F	IV	LIMA	LIMA/CALLAO	1943-07-25	2021-03-26	ovarian	High-Grade Serous Carcinoma	BRCA1	TMR15-1930	H971Qfs*29	10	2913delT	His971Glnfs*29	inframe deletion	pathogenic
701	F	III	LIMA	LIMA/CALLAO	2021-03-29	2021-03-29	ovarian	High-Grade Serous Carcinoma	Not variant found	TMR15-1933					Not variant found	Not variant found
703	F	III	LIMA	LIMA/CALLAO	2021-04-09	2021-04-09	ovarian	High-Grade Serous Carcinoma	Not variant found	TMR15-1943					Not variant found	Not variant found
